# Supplementary material
Source: Royal Society of Chemistry journal article supplement (doi:10.1039/d6cp00661b)
Supplement: d6cp00661b1.pdf [file d6cp00661b1.pdf]

## Supporting Information

### **Muonium addition to the C=S sulfur in the conformationally regulated thiobenzophenone**

Tetsuya Fujino,<sup>a</sup> Masaya Morisaki,<sup>a</sup> Shoichiro Nishimura,<sup>b</sup> Jumpei G. Nakamura,<sup>b</sup>  
Akihiro Koda,<sup>b</sup> Shigekazu Ito<sup>\*a,b</sup>

<sup>a</sup> *Department of Chemical Science and Engineering, School of Materials and Chemical Technology, Institute of Science Tokyo (Science Tokyo), 2-12-1-H113 Ookayama, Meguro-ku, Tokyo 152-8552, Japan. E-mail: ito@mct.isct.ac.jp*

<sup>b</sup> *Muon Science Laboratory, Institute of Materials Structure Science, High Energy Acceleration Research Organization (KEK), 203-1 Shirakata, Tokai-mura, Naka-gun, Ibaraki 319-1106, Japan*

|                                                                                                          |    |
|----------------------------------------------------------------------------------------------------------|----|
| Synthesis of thioketones .....                                                                           | 2  |
| Physical properties of thioketones .....                                                                 | 7  |
| A brief description of $\mu$ LCR (ALC- $\mu$ SR) .....                                                   | 9  |
| Samples for $\mu$ LCR measurements .....                                                                 | 11 |
| Raw $\mu$ LCR spectra before subtracting Ag background, baseline corrections,<br>and normalization ..... | 12 |
| Analyzing the temperature dependence of the $\mu$ LCR spectra .....                                      | 15 |
| DFT calculation data .....                                                                               | 16 |
| Copies of NMR charts .....                                                                               | 38 |

## Synthesis of thioketones

### General

All experiments were conducted under an inert atmosphere (nitrogen or argon) unless otherwise noted.  $^1\text{H}$  NMR and  $^{13}\text{C}$  NMR spectra were measured on an Avance Neo (400 MHz) spectrometer. Chemical shifts of  $^1\text{H}$  NMR were expressed in parts per million downfield from  $\text{CHCl}_3$  and MeCN as internal standards ( $\delta = 7.26$  and  $2.05$ ) in  $\text{CDCl}_3$  and in acetonitrile- $d_3$ . Chemical shifts of  $^{13}\text{C}$  NMR were expressed in parts per million relative to the central line of the triplet ( $\delta = 77.10$ ) for  $\text{CDCl}_3$  and the singlet ( $\delta = 118.26$ ) in acetonitrile- $d_3$ . Important NMR data were tabulated in the following order: multiplicity (s: singlet, d: doublet, t: triplet, q: quartet, m: multiplet, br: broad) and coupling constant  $J$  (Hz). UV-Vis spectra were measured on a Hitachi U4100 spectrometer.

Analytical thin-layer chromatography (TLC) was performed on a glass plate pre-coated with silica gel (Merck Kieselgel 60 F254, layer thickness 0.25 mm). Visualization was accomplished by UV light (254 nm) and anisaldehyde. Column chromatography was performed on KANTO Silica Gel 60N (spherical, neutral).

Dichloromethane (dehydrate) chloroform(dehydrate), tetrahydrofuran (dehydrate), diethyl ether (dehydrate), ethyl acetate (dehydrate), acetonitrile (dehydrate), ethanol (dehydrate), phosphoryl chloride and hydrochloric acid were purchased from Kanto Chemical Co., Inc.

### Thiodibenzosuberone (10,11-dihydro-5*H*-dibenzo[*a,d*][7]annulene-5-thione) **4**<sup>46</sup>

Lawesson's reagent (0.57 g, 1.4 mmol) was added to a toluene solution (10 ml) of dibenzosuberone (2.0 mmol, 0.42 g), and the mixture was then heated to reflux for 3.5 h before removal of the solvent in vacuo. The residue was purified by column chromatography (silica gel, hexane), thereby affording **4** (0.21 g, 46%) as a purple solid.  $^1\text{H}$  NMR (400 MHz,  $\text{CDCl}_3$ )  $\delta$  7.75 (dd, 2H,  $J = 7.8, 1.2$  Hz), 7.35 (td, 2H,  $J = 7.5, 1.6$  Hz), 7.19 (td, 2H,  $J = 7.6, 1.2$  Hz), 7.11 (d, 2H,  $J = 7.4$  Hz), 3.18 (s, 4H).

### 3-Phenethylphthalide **7**<sup>47</sup>

(2-Bromoethyl)benzene (2.0 ml, 15 mmol) was added to magnesium turnings (0.36 g, 15 mmol) in THF (15 ml) under nitrogen slowly. The reaction was stirred for 30 min at room temperature before being cooled to 0 °C. A THF solution (15 ml) of phthalaldehydic acid (1.4 g, 9.3 mmol) was added to the stirring mixture at 0 °C. The mixture was stirred for 1 h at room temperature. The reaction was quenched with aqueous HCl and extracted with EtOAc. The combined organic layer was washed with brine (20 mL), dried over  $\text{Na}_2\text{SO}_4$  and filtered. After removal of the solvents in vacuo, the residue was purified by column

chromatography (silica gel, hexane/EtOAc = 100:1) affording 3-phenethylphthalide **7** (1.2 g, 5.1 mmol, 55%) as a colorless solid.

<sup>1</sup>H NMR (400 MHz, CDCl<sub>3</sub>) δ 7.91 (d, 1H, *J* = 7.7 Hz), 7.66 (td, 1H, *J* = 7.5, 1.1 Hz), 7.52 (t, 1H, *J* = 7.5 Hz), 7.41 (dd, 1H, *J* = 7.7, 0.82 Hz), 7.32-7.28 (m, 2H), 7.23-7.19 (m, 3H), 5.47 (dd, 1H, *J* = 8.8, 3.5 Hz), 2.87-2.82 (m, 2H), 2.39-2.31 (m, 1H), 2.08-1.99 (m, 1H).

### **2-(3-Phenylpropyl)benzoic acid **8****<sup>47</sup>

3-Phenethylphthalide **7** (1.2 g, 5.0 mmol) was added to hydriodic acid (57wt%, 8 ml) under nitrogen. The mixture was then heated to reflux for 24 h prior to being extracted with hexane (10 ml x 2) and EtOAc (10 ml). The combined organic layer was washed with sat. KI aq. and dried over Na<sub>2</sub>SO<sub>4</sub> and filtered. After removal of the solvents in vacuo, the crude was used in the next reaction without any purification.

### **Dibenzo[*a,d*]cycloocten-12(5*H*)-one (**10**)**<sup>47</sup>

Oxalyl chloride (0.79 ml, 10 mmol) and DMF (4 drops) were added to a CH<sub>2</sub>Cl<sub>2</sub> (20 ml) solution of the crude material containing **8** (0.80 g) at 0 °C. The mixture was stirred at room temperature for 3 h. After removal of the solvents in vacuo, AlCl<sub>3</sub> (2.0 g, 15 mmol) and CH<sub>2</sub>Cl<sub>2</sub> (20 ml) were added to the mixture under nitrogen at 0 °C. The mixture was stirred for 18 h. The reaction was quenched with aqueous HCl and extracted with CH<sub>2</sub>Cl<sub>2</sub>. The combined organic layer was washed with brine (20 mL), dried over Na<sub>2</sub>SO<sub>4</sub>, and filtered. After removal of the solvents in vacuo, the residue was purified by column chromatography (silica gel, hexane/EtOAc = 50:1), affording dibenzo[*a,d*]cycloocten-12(5*H*)-one **10** (0.11 g, 0.48 mmol) as a yellow solid (22% from **7**).

<sup>1</sup>H NMR (400 MHz, CDCl<sub>3</sub>) δ 8.04 (dd, 2H, *J* = 7.9, 1.4 Hz), 7.50 (td, 2H, *J* = 7.4, 1.5 Hz), 7.37 (td, 2H, *J* = 7.9, 1.3 Hz), 7.18 (dd, 2H, *J* = 7.6, 1.1 Hz), 2.64 (t, 4H, *J* = 6.3 Hz), 1.84-1.78 (m, 2H).

### **Dibenzo[*a,d*]cycloocten-12(5*H*)-thione (**5**)**

Lawesson's reagent (0.20 g, 0.50 mmol) was added to a toluene solution (5.0 ml) of **10** (0.50 mmol, 0.11 g), and the mixture was then heated to reflux for 3 h before removal of the solvent in vacuo. The residue was purified by column chromatography (silica gel, hexane), affording dibenzo[*a,d*]cycloocten-12(5*H*)-thione (**5**) (0.073 g, 62%) as a greenish blue solid.

<sup>1</sup>H NMR (400 MHz, CDCl<sub>3</sub>) δ 8.12 (dd, 2H, *J* = 8.1, 1.2 Hz), 7.46 (td, 2H, *J* = 7.2, 1.2 Hz), 7.27-7.23 (m, *J* = 1.2 Hz, 2H, overlap with CHCl<sub>3</sub>), 7.08 (dd, 2H, *J* = 7.6, 1.2 Hz),

2.62 (t, 4H,  $J = 6.4$  Hz), 1.84-1.77 (m, 2H); (acetonitrile- $d_3$ )  $\delta$  7.91 (dd, 2H,  $J = 8.0, 0.8$  Hz), 7.37 (td, 2H,  $J = 7.6, 1.2$  Hz), 7.13 (td, 2H,  $J = 8.1, 1.1$  Hz), 7.01 (dd, 2H,  $J = 7.6, 0.8$  Hz), 2.43 (t, 4H,  $J = 6.3$  Hz), 1.66-1.60 (m, 2H);  $^{13}\text{C}\{^1\text{H}\}$  NMR (101 MHz, acetonitrile- $d_3$ )  $\delta$  147.8, 137.4, 132.4, 132.3, 129.3, 125.9, 33.6, 30.3, (101 MHz, in  $\text{CDCl}_3$ )  $\delta$  266.9 (C=S). FAB-MS calcd for  $\text{C}_{16}\text{H}_{14}\text{S}$  [ $\text{M}^+$ ] 238.08, found 238.07.

\*ESI-MS and APCI-MS did not show the corresponding  $m/z$  signal.

#### ***o*-Allylbromobenzene (11)<sup>48</sup>**

0.1 M vinylmagnesium bromide in THF (30 mL, 30 mmol) was added to a suspension of **10** (7.3 g, 30 mmol), CuI (0.57 g, 3.0 mmol) and 2,2'-bipyridine (0.47 g, 3.0 mmol) in toluene (50 mL) at  $-78$  °C. The mixture was stirred for 24 h. The reaction was quenched with HCl aq. and extracted with EtOAc. The combined organic layer was washed with brine (20 mL) and dried over  $\text{Na}_2\text{SO}_4$ , and filtered. After removal of the solvents in vacuo, the residue was purified by column chromatography (silica gel, hexane), affording *o*-allylbromobenzene (**11**) (4.2 g, 22 mmol, 74%) as a colorless liquid.

$^1\text{H}$  NMR (400 MHz,  $\text{CDCl}_3$ )  $\delta$  7.56-7.53 (m, 1H), 7.27-7.21 (m, 2H), 7.10-7.06 (m, 1H), 5.98 (ddt, 1H,  $J = 16.7, 10.2, 6.5$  Hz), 5.14-5.05 (m, 2H), 3.52 (dt, 2H,  $J = 6.5, 1.4$  Hz).

#### ***o*-Allylbenzaldehyde (12)<sup>49</sup>**

*o*-Allylbromobenzene (**11**) (2.6 ml, 13 mmol) was added to magnesium turnings (0.36 g, 15 mmol) in THF (25 ml) under nitrogen slowly. The reaction was stirred for 45 min at room temperature before being cooled to 0 °C. DMF (1.5 ml, 1.9 mmol) was added to the stirring mixture at 0 °C. The mixture was stirred for 18 h at room temperature. The reaction was quenched with HCl aq. and extracted with EtOAc. The combined organic layer was washed with brine (20 mL), dried over  $\text{Na}_2\text{SO}_4$ , and filtered. After removal of the solvents in vacuo, the residue was purified by column chromatography (silica gel, hexane/EtOAc = 30:1), affording *o*-allylbenzaldehyde (**12**) (1.4 g, 9.3 mmol, 71%) as a yellow oil.

$^1\text{H}$  NMR (400 MHz,  $\text{CDCl}_3$ )  $\delta$  10.26 (s, 1H), 7.85 (dd, 1H,  $J = 7.7, 1.4$  Hz), 7.53 (td, 1H,  $J = 7.5, 1.7$  Hz), 7.40 (td, 1H,  $J = 7.5, 0.93$  Hz), 7.30 (d, 2H,  $J = 7.6$  Hz), 6.04 (ddt, 1H,  $J = 17.3, 10.1, 6.5$  Hz), 5.09 (dq, 1H,  $J = 10.1, 1.5$  Hz), 4.99 (dq, 1H,  $J = 17.1, 1.7$  Hz), 3.83 (dt, 2H,  $J = 3.4, 1.4$  Hz).

#### **Bis(2-allylphenyl)methanol (13)**

*o*-Allylbromobenzene (**11**) (1.1 ml, 8 mmol) was added to magnesium turnings (0.20 g, 8.2 mmol) in THF (20 ml) under nitrogen slowly. The reaction was stirred for 45 min at

room temperature before being cooled to 0 °C. A THF solution (8 ml) of *o*-allylbenzaldehyde (**12**) (1.0 g, 8.2 mmol) was added to the stirring mixture at 0 °C. The mixture was stirred for 18 h at room temperature. The reaction was quenched with HCl aq. and extracted with EtOAc. The combined organic layer was washed with brine (20 mL) and dried over Na<sub>2</sub>SO<sub>4</sub> and filtered. After removal of the solvents in vacuo, the residue was purified by column chromatography (silica gel, hexane/EtOAc = 20:1), thereby affording bis(2-allylphenyl)methanol (1.7 g, 6.3 mmol, 92%) as a colorless solid. <sup>1</sup>H NMR (400 MHz, CDCl<sub>3</sub>) δ 7.31-7.19 (m, 8H), 6.27 (s, 1H), 5.94 (ddt, 2H, *J* = 17.1, 10.1, 6.3 Hz), 5.06 (dq, 2H, *J* = 10.1, 1.5 Hz), 4.99 (dq, 2H, *J* = 17.1, 1.7 Hz), 3.43-3.32 (m, 4H), 2.07 (br, 1H); <sup>13</sup>C {<sup>1</sup>H} NMR (101 MHz, CDCl<sub>3</sub>) δ 140.8, 137.6, 137.4, 130.1, 127.9, 127.2, 126.7, 116.1, 69.5, 36.8.

#### **Bis(2-allylphenyl)methanone (14)**

A CH<sub>2</sub>Cl<sub>2</sub> (9.0 ml) solution of oxalyl chloride (0.51 ml, 6.0 mmol) was added dropwise to a CH<sub>2</sub>Cl<sub>2</sub> (9.0 ml) solution of DMSO (0.64 ml, 9.0 mmol) for 15 min at -78 °C. After that, a CH<sub>2</sub>Cl<sub>2</sub> (4.5 ml) solution of **13** (0.79 g, 3.0 mmol) was added to the mixture at -78 °C. Triethylamine (2.1 ml, 15 mmol) was added to the mixture at -78 °C prior to being stirred at room temperature for 60 min. The reaction was quenched with HCl aq. and extracted with EtOAc. The combined organic layer was washed with brine (20 mL) and dried over Na<sub>2</sub>SO<sub>4</sub>, and filtered. After removal of the solvents in vacuo, the residue was purified by column chromatography (silica gel, hexane/EtOAc = 20:1), affording bis(2-allylphenyl)methanone (**14**) (0.68 g, 2.6 mmol, 86%) as a yellow oil.

<sup>1</sup>H NMR (400 MHz, CDCl<sub>3</sub>) δ 7.43 (td, 2H, *J* = 7.6, 1.6 Hz), 7.33 (dd, 2H, *J* = 7.7, 0.6 Hz), 7.28 (dd, 2H, *J* = 7.7, 1.4 Hz), 7.21 (td, 2H, *J* = 7.5, 1.2 Hz), 5.97 (ddt, 2H, *J* = 16.7, 10.3, 6.6 Hz), 5.04-4.98 (m, 4H), 3.60 (d, 4H, *J* = 6.6 Hz); <sup>13</sup>C {<sup>1</sup>H} NMR (101 MHz, CDCl<sub>3</sub>) δ 200.4, 140.4, 138.9, 137.2, 131.3, 130.8 (x2), 125.8, 116.1, 37.7.

#### **(Z)-5,8-Dihydro-13H-dibenzo[*a,d*][9]annulen-13-one (15)**

Grubbs Catalyst<sup>®</sup> M204 (4.6 mg, 5.4 μmol) was added to a toluene (20 ml) solution of **14** (0.13 g, 0.50 mmol). The mixture was stirred for 18 h at 80 °C. After removal of the solvent in vacuo, the residue was purified by column chromatography (silica gel, hexane/EtOAc = 100:1), affording (*Z*)-5,8-dihydro-13H-dibenzo[*a,d*][9]annulen-13-one (**15**) (0.056 g, 0.24 mmol, 47%) as a colorless solid.

<sup>1</sup>H NMR (400 MHz, CDCl<sub>3</sub>) δ 7.48 (dd, 2H, *J* = 7.6, 1.4 Hz), 7.40 (td, 2H, *J* = 7.5, 1.7 Hz), 7.29 (td, 2H, *J* = 7.5, 1.2 Hz), 7.16 (dd, 2H, *J* = 7.6, 0.73 Hz), 5.69-5.66 (m, 4H), 3.3 (dd, 2H, *J* = 5.1 Hz); <sup>13</sup>C {<sup>1</sup>H} NMR (101 MHz, CDCl<sub>3</sub>) δ 201.9, 141.1, 138.7, 131.3,

130.2, 129.9, 127.5, 126.6, 33.0.

**5,6,7,8-Tetrahydro-13*H*-dibenzo[*a,d*][9]annulen-13-one (16)**<sup>51,52</sup>

Pd/C (0.032 g, 0.30 mmol) was added to a methanol (20 ml) solution of **15** (0.22 g, 0.91 mmol) under hydrogen with a balloon. The mixture was stirred for 12 h at room temperature under hydrogen. After filtering the organic layer and removal of the solvent in vacuo, the residue was purified by column chromatography (silica gel, hexane/EtOAc = 100:1), affording 5,6,7,8-tetrahydro-13*H*-dibenzo[*a,d*][9]annulen-13-one (**16**) (0.19 g, 0.78 mmol, 86%) as a colorless solid.

<sup>1</sup>H NMR (400 MHz, CDCl<sub>3</sub>) δ 7.46 (dd, 2H, *J* = 7.6, 1.3 Hz), 7.37 (td, 2H, *J* = 7.5, 1.5 Hz), 7.27 (td, 2H, *J* = 7.5, 1.2 Hz), 7.17 (dd, 2H, *J* = 7.6, 0.53 Hz), 2.67-2.63 (m, 4H), 1.73-1.70 (m, 4H); <sup>13</sup>C {<sup>1</sup>H} NMR (101 MHz, CDCl<sub>3</sub>) δ 203.4, 141.6, 141.2, 131.0, 130.7, 126.7, 126.2, 33.0, 27.1.

**5,6,7,8-Tetrahydro-13*H*-dibenzo[*a,d*][9]annulen-13-thione (6)**

Lawesson's reagent (0.26 g, 0.63 mmol) was added to a toluene solution (6 ml) of **16** (0.86 mmol, 0.21 g), and the mixture was then heated to reflux for 3.5 h before removal of the solvent in vacuo. The residue was purified by column chromatography (silica gel, hexane), affording 5,6,7,8-tetrahydro-13*H*-dibenzo[*a,d*][9]annulen-13-thione (**6**) (0.062 g, 28%) as a blue amorphous solid.

<sup>1</sup>H NMR (400 MHz, CDCl<sub>3</sub>) δ 7.42 (dd, 2H, *J* = 7.7, 1.3 Hz), 7.31 (td, 2H, *J* = 7.5, 1.5 Hz), 7.19 (td, 2H, *J* = 7.6, 1.3 Hz), 7.11 (dd, 2H, *J* = 7.5, 0.7 Hz), 2.70 (br, 4H), 1.70 (br, 4H); <sup>13</sup>C {<sup>1</sup>H} NMR (101 MHz, CDCl<sub>3</sub>) δ 249.4, 150.6, 140.2, 130.5, 130.3, 126.9, 125.9, 33.4, 28.3. HRMS (ESI<sup>+</sup>) calcd for C<sub>17</sub>H<sub>16</sub>SK [M<sup>+</sup>+K] 0291.0610, found 291.0979.

## Physical properties of thioketones

### UV-Vis Spectra

#### Dibenzo[*a,d*]cycloocten-12(5*H*)-thione (5)

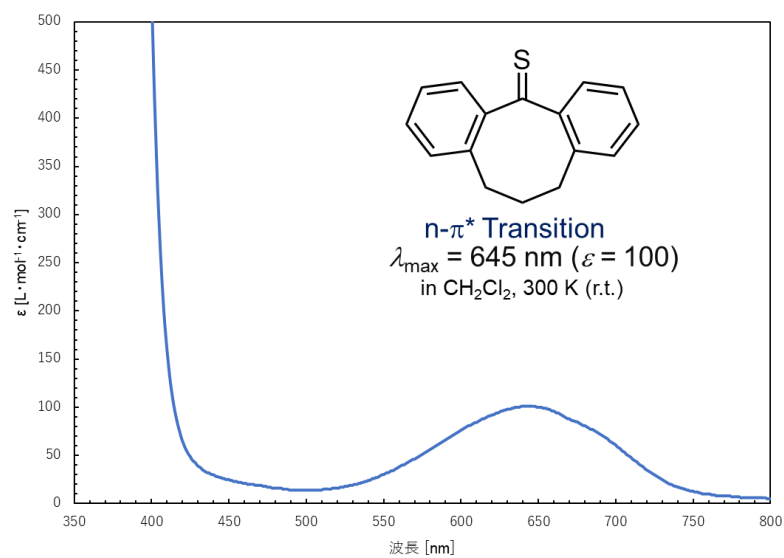

#### 5,6,7,8-tetrahydro-13H-dibenzo[*a,d*][9]annulen-13-thione (6)

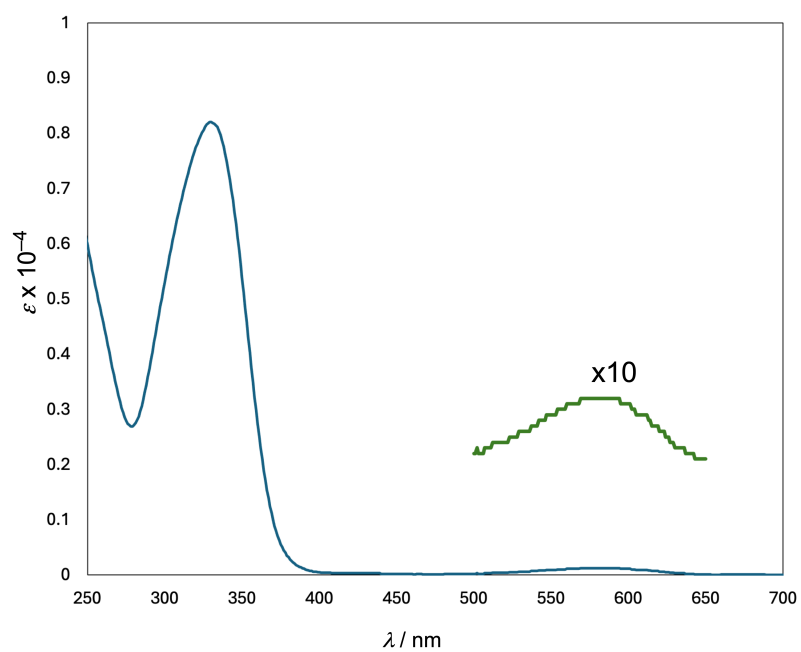

**Table S1.** Typical physical properties of cyclic thioketones **4–6** and acyclic **1**

| Compound | $^{13}\text{C}$ NMR (C=S) / $\delta$ | n- $\pi^*$ $\lambda_{\text{max}}$ / nm | Refs.     |
|----------|--------------------------------------|----------------------------------------|-----------|
| <b>4</b> | 246.7                                | 593                                    | 53        |
| <b>5</b> | 266.7 <sup>a)</sup>                  | 645 <sup>b)</sup>                      | This work |
| <b>6</b> | 249.4 <sup>a)</sup>                  | 582 <sup>b)</sup>                      | This work |
| <b>1</b> | 238.7                                | 610                                    | 54-56     |

a) In  $\text{CDCl}_3$ , 300 K.

b) In  $\text{CH}_2\text{Cl}_2$ , 300 K.

## A brief description of $\mu$ LCR (ALC- $\mu$ SR)

In muon *avoided* level-crossing resonance ( $\mu$ LCR) measurements, the magnetic field is oriented parallel to the muon beam polarization, and the positron rate is measured in the forward and backward directions (Figure S1a). The difference in the rates is the muon asymmetry  $A(t)$ , which is proportional to the longitudinal muon spin polarization (Eq. 2 in the main text). For the coupled spin system of a muoniated free radical, there are some fields where the mixing of a pair of spin states results in an avoided crossing. If the mixed states involve different muon spin orientations, there is a partial loss of spin polarization at the resonance field. In Figure S1b,  $M$  is the sum of the spin quantum numbers of the muon ( $\mu$ ), electron (e), and  $I=1/2$  nucleus ( $k$ ). For  $\Delta_1$  ( $\Delta M=\pm 1$ ) transitions, the resonant state involves an exchange of the muon spin. The level-crossing is avoided by indirect coupling of both Zeeman states to a third one. This avoided resonance occurs at a magnetic field according to Eq. 3 in the main text. The anisotropic motion of the muoniated radicals normally promotes the  $\Delta_1$  transitions.

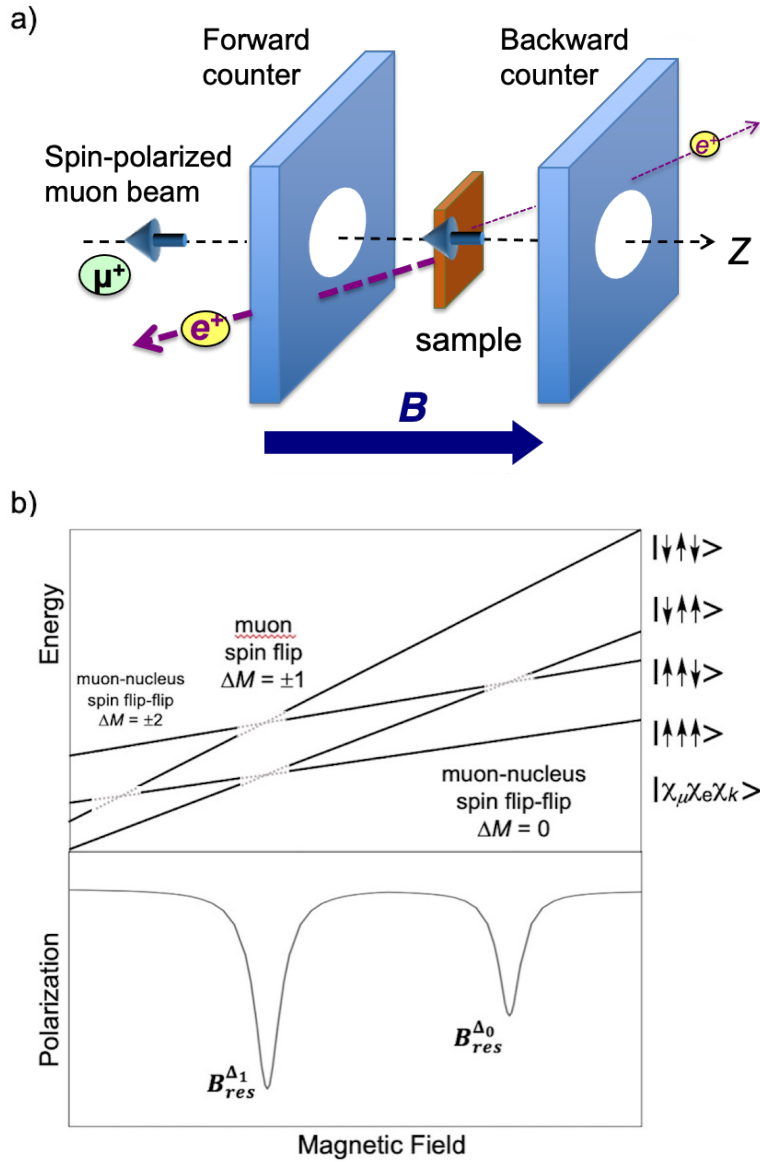

**Fig. S1** a) A schematic of  $\mu$ LCR geometry. The longitudinal external field is denoted as  $B$ . b) Top panel: Energy diagram for a three-spin system [muon ( $\mu$ ), electron ( $e$ ),  $I = 1/2$  nucleus ( $k$ )]. Bottom panel: LCR resonances occur when states with opposite muon spin become near degenerate in energy. A transition with  $\Delta M = \pm 2$ , a muon-nucleus spin flip-flip transition, is usually very weak and negligible.

## Samples for $\mu$ LCR measurement

4

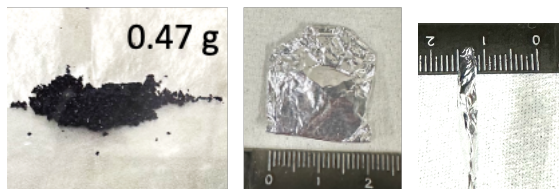

5

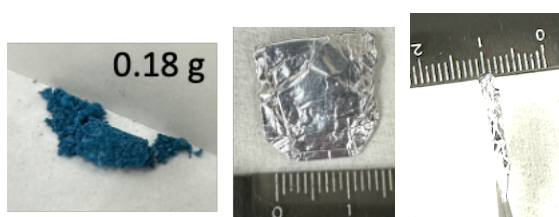

6

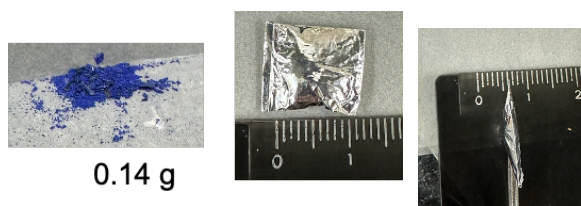

**Fig. S2** Pelletized samples 4–6 for  $\mu$ LCR measurements.

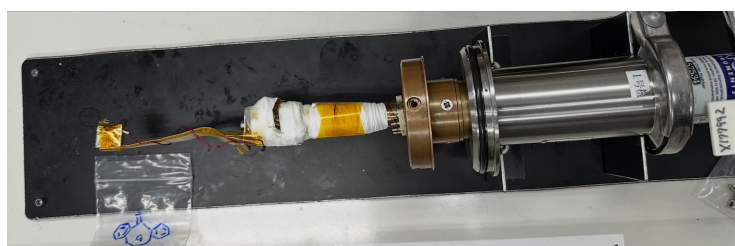

**Fig. S3** The Microstat probe with the sample of 6.

# Raw $\mu$ LCR spectra before subtracting Ag background, baseline corrections, and normalization

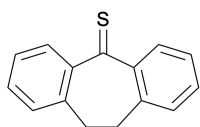

4

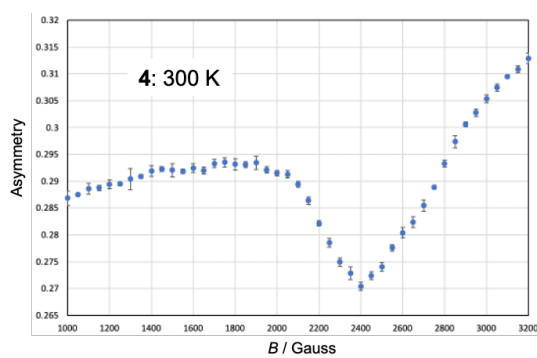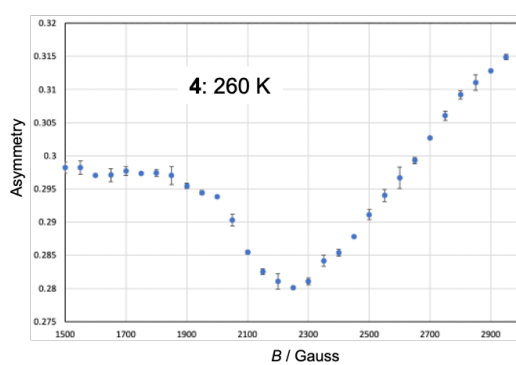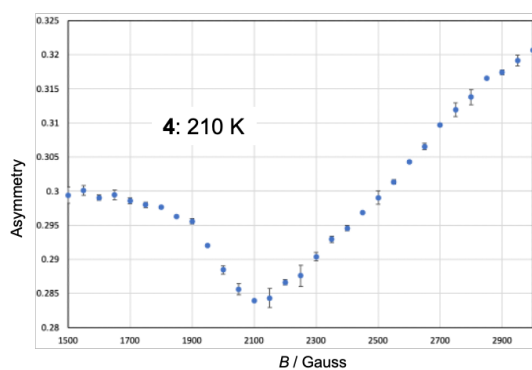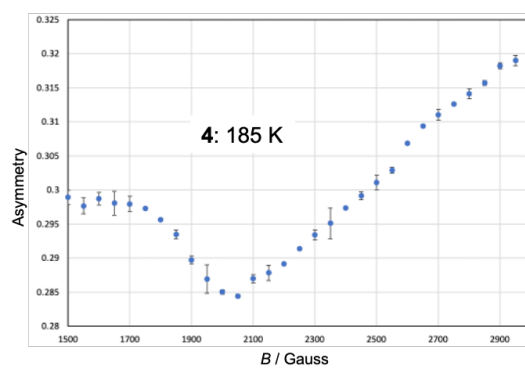

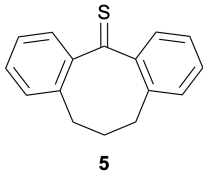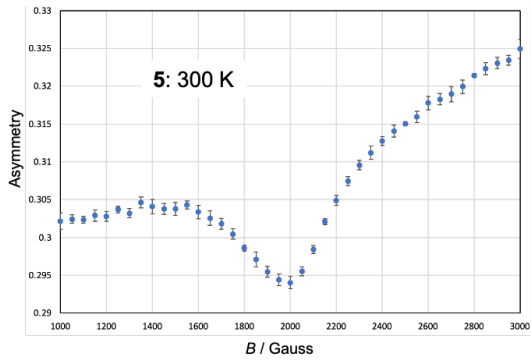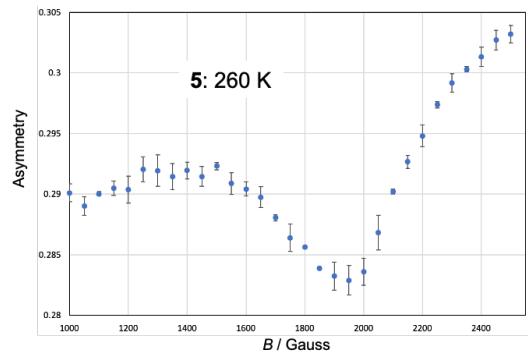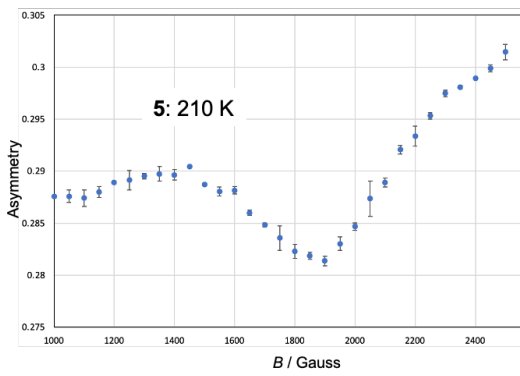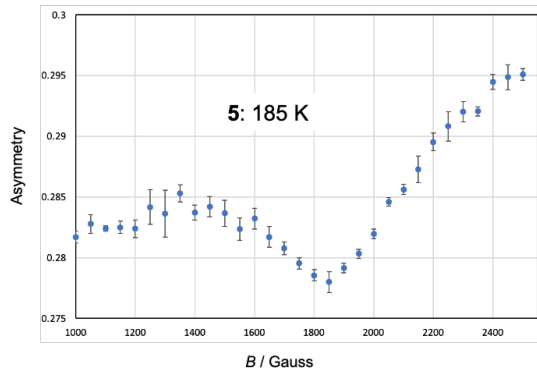

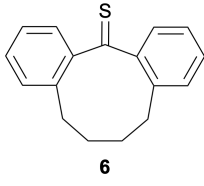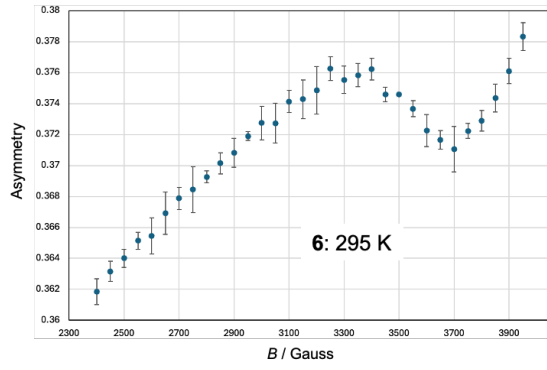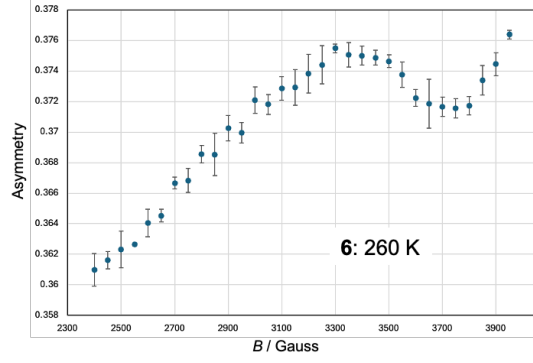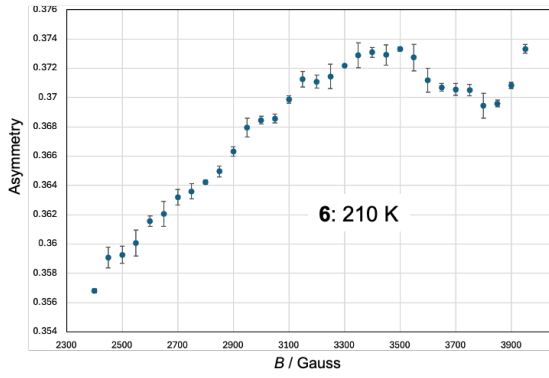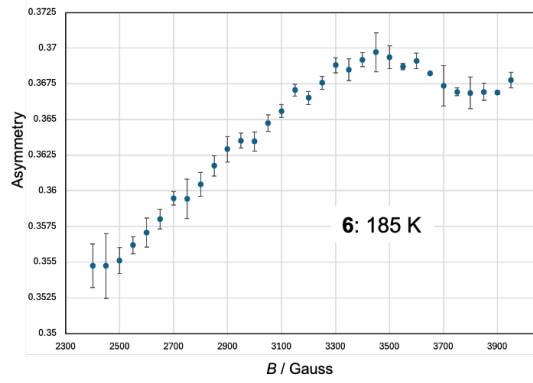

### Analyzing the temperature dependence of the $\mu$ LCR spectra

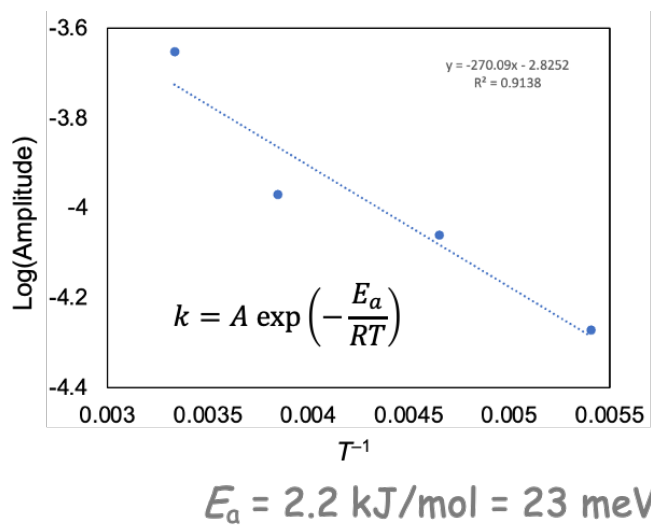

**Fig. S4** An Arrhenius plot of the  $\mu$ LCR amplitudes and reciprocal temperature for **4Mu**, showing a least-squares regression line.

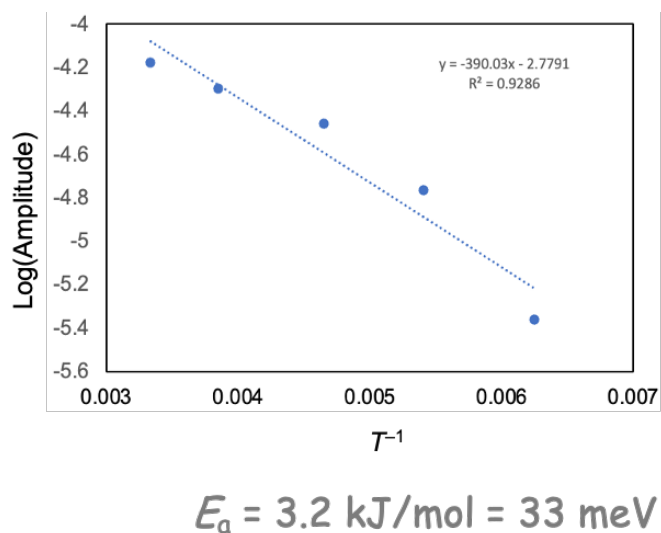

**Fig. S5** An Arrhenius plot of the  $\mu$ LCR amplitudes and reciprocal temperature for **5Mu**, showing a least-squares regression line.

## DFT calculation data

The structures of cyclic thioketones **4–6** and acyclic thiobenzophenone **1** were optimized at the B3LYP/def2-SVP level by using the Gaussian 09 software package. The structure of **1Mu** was optimized at the UB3LYP/def2-SVP level, and its vibrational averaging was conducted with Fermi keyword by using the Gaussian 16 software package.

Gaussian 09, Revision B.01, M. J. Frisch, G. W. Trucks, H. B. Schlegel, G. E. Scuseria, M. A. Robb, J. R. Cheeseman, G. Scalmani, V. Barone, B. Mennucci, G. A. Petersson, H. Nakatsuji, M. Caricato, X. Li, H. P. Hratchian, A. F. Izmaylov, J. Bloino, G. Zheng, J. L. Sonnenberg, M. Hada, M. Ehara, K. Toyota, R. Fukuda, J. Hasegawa, M. Ishida, T. Nakajima, Y. Honda, O. Kitao, H. Nakai, T. Vreven, J. A. Montgomery, Jr., J. E. Peralta, F. Ogliaro, M. Bearpark, J. J. Heyd, E. Brothers, K. N. Kudin, V. N. Staroverov, T. Keith, R. Kobayashi, J. Normand, K. Raghavachari, A. Rendell, J. C. Burant, S. S. Iyengar, J. Tomasi, M. Cossi, N. Rega, J. M. Millam, M. Klene, J. E. Knox, J. B. Cross, V. Bakken, C. Adamo, J. Jaramillo, R. Gomperts, R. E. Stratmann, O. Yazyev, A. J. Austin, R. Cammi, C. Pomelli, J. W. Ochterski, R. L. Martin, K. Morokuma, V. G. Zakrzewski, G. A. Voth, P. Salvador, J. J. Dannenberg, S. Dapprich, A. D. Daniels, O. Farkas, J. B. Foresman, J. V. Ortiz, J. Cioslowski, D. J. Fox, Gaussian 09, Revision B.01, Gaussian, Inc., Wallingford CT, 2010.

Gaussian 16, Revision C.01, M. J. Frisch, G. W. Trucks, H. B. Schlegel, G. E. Scuseria, M. A. Robb, J. R. Cheeseman, G. Scalmani, V. Barone, G. A. Petersson, H. Nakatsuji, X. Li, M. Caricato, A. V. Marenich, J. Bloino, B. G. Janesko, R. Gomperts, B. Mennucci, H. P. Hratchian, J. V. Ortiz, A. F. Izmaylov, J. L. Sonnenberg, D. Williams-Young, F. Ding, F. Lipparini, F. Egidi, J. Goings, B. Peng, A. Petrone, T. Henderson, D. Ranasinghe, V. G. Zakrzewski, J. Gao, N. Rega, G. Zheng, W. Liang, M. Hada, M. Ehara, K. Toyota, R. Fukuda, J. Hasegawa, M. Ishida, T. Nakajima, Y. Honda, O. Kitao, H. Nakai, T. Vreven, K. Throssell, J. A. Montgomery, Jr., J. E. Peralta, F. Ogliaro, M. J. Bearpark, J. J. Heyd, E. N. Brothers, K. N. Kudin, V. N. Staroverov, T. A. Keith, R. Kobayashi, J. Normand, K. Raghavachari, A. P. Rendell, J. C. Burant, S. S. Iyengar, J. Tomasi, M. Cossi, J. M. Millam, M. Klene, C. Adamo, R. Cammi, J. W. Ochterski, R. L. Martin, K. Morokuma, O. Farkas, J. B. Foresman, and D. J. Fox, Gaussian, Inc., Wallingford CT, 2016.

1

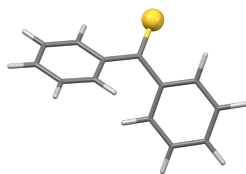

E(RB3LYP) = -899.122167918 A.U.

| Center Number | Atomic Number | Atomic Type | Coordinates (Angstroms) |           |           |
|---------------|---------------|-------------|-------------------------|-----------|-----------|
|               |               |             | X                       | Y         | Z         |
| 1             | 6             | 0           | 1.276977                | 0.155906  | 0.026244  |
| 2             | 6             | 0           | 0.000000                | 0.918975  | 0.000000  |
| 3             | 6             | 0           | -2.600464               | -1.735727 | -0.818062 |
| 4             | 6             | 0           | -1.276977               | 0.155906  | -0.026244 |
| 5             | 1             | 0           | -2.666372               | -2.664143 | -1.390978 |
| 6             | 6             | 0           | -1.382281               | -1.057943 | -0.737852 |
| 7             | 6             | 0           | -3.730641               | -1.228721 | -0.170771 |
| 8             | 16            | 0           | 0.000000                | 2.571558  | 0.000000  |
| 9             | 1             | 0           | -4.681514               | -1.765046 | -0.225278 |
| 10            | 6             | 0           | -3.639308               | -0.029664 | 0.546451  |
| 11            | 6             | 0           | 1.382281                | -1.057943 | 0.737853  |
| 12            | 1             | 0           | -4.518141               | 0.370186  | 1.058581  |
| 13            | 6             | 0           | -2.430555               | 0.660147  | 0.608838  |
| 14            | 1             | 0           | -2.356064               | 1.603648  | 1.152555  |
| 15            | 6             | 0           | 2.430554                | 0.660147  | -0.608839 |
| 16            | 1             | 0           | 2.356063                | 1.603647  | -1.152557 |
| 17            | 6             | 0           | 3.639308                | -0.029664 | -0.546452 |
| 18            | 1             | 0           | 4.518140                | 0.370185  | -1.058583 |
| 19            | 6             | 0           | 3.730641                | -1.228721 | 0.170770  |
| 20            | 1             | 0           | 4.681514                | -1.765046 | 0.225277  |
| 21            | 6             | 0           | 2.600464                | -1.735726 | 0.818062  |
| 22            | 1             | 0           | 2.666372                | -2.664142 | 1.390979  |
| 23            | 1             | 0           | -0.508739               | -1.458024 | -1.255649 |
| 24            | 1             | 0           | 0.508739                | -1.458023 | 1.255650  |

Temperature 298.150 Kelvin. Pressure 1.00000 Atm.  
 Zero-point correction= 0.189202 (Hartree/Particle)  
 Thermal correction to Energy= 0.200216  
 Thermal correction to Enthalpy= 0.201160  
 Thermal correction to Gibbs Free Energy= 0.150940  
 Sum of electronic and zero-point Energies= -898.932965  
 Sum of electronic and thermal Energies= -898.921952  
 Sum of electronic and thermal Enthalpies= -898.921008  
 Sum of electronic and thermal Free Energies= -898.971228

4

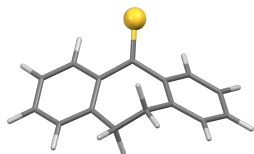

E(RB3LYP) = -976.487395027 A.U.

| Center Number | Atomic Number | Atomic Type | Coordinates (Angstroms) |           |           |
|---------------|---------------|-------------|-------------------------|-----------|-----------|
|               |               |             | X                       | Y         | Z         |
| 1             | 1             | 0           | 3.214356                | -2.382387 | 0.463261  |
| 2             | 6             | 0           | -0.019018               | 1.005708  | 0.328742  |
| 3             | 6             | 0           | -1.305405               | 0.310565  | 0.016746  |
| 4             | 6             | 0           | -1.518553               | -1.094913 | 0.048871  |
| 5             | 6             | 0           | 3.791494                | -0.684729 | -0.740499 |
| 6             | 6             | 0           | 3.418473                | 0.577433  | -1.211330 |
| 7             | 6             | 0           | 2.181435                | 1.111766  | -0.854796 |
| 8             | 6             | 0           | 1.283873                | 0.383546  | -0.051566 |
| 9             | 6             | 0           | 1.658770                | -0.891107 | 0.422871  |
| 10            | 6             | 0           | 2.916529                | -1.403282 | 0.076959  |
| 11            | 6             | 0           | -2.383242               | 1.141553  | -0.379151 |
| 12            | 6             | 0           | -2.781604               | -1.586786 | -0.329631 |
| 13            | 1             | 0           | 4.764683                | -1.106872 | -1.003672 |
| 14            | 1             | 0           | 4.095109                | 1.151424  | -1.849191 |
| 15            | 1             | 0           | 1.890997                | 2.107006  | -1.196214 |
| 16            | 6             | 0           | -3.615536               | 0.629396  | -0.760471 |
| 17            | 6             | 0           | -3.818212               | -0.754130 | -0.739169 |
| 18            | 1             | 0           | -4.413771               | 1.305589  | -1.075727 |
| 19            | 1             | 0           | -4.780965               | -1.180928 | -1.031860 |
| 20            | 16            | 0           | 0.004444                | 2.512832  | 1.003686  |
| 21            | 1             | 0           | -2.213175               | 2.218645  | -0.390174 |
| 22            | 1             | 0           | -2.949986               | -2.666952 | -0.287312 |
| 23            | 6             | 0           | -0.520477               | -2.146421 | 0.504871  |
| 24            | 6             | 0           | 0.705824                | -1.673063 | 1.287960  |
| 25            | 1             | 0           | -0.176345               | -2.709560 | -0.382453 |
| 26            | 1             | 0           | 1.221272                | -2.553577 | 1.701035  |
| 27            | 1             | 0           | -1.072281               | -2.876799 | 1.120232  |
| 28            | 1             | 0           | 0.382889                | -1.064132 | 2.150658  |

Temperature 298.150 Kelvin. Pressure 1.00000 Atm.  
 Zero-point correction= 0.224915 (Hartree/Particle)  
 Thermal correction to Energy= 0.237013  
 Thermal correction to Enthalpy= 0.237957  
 Thermal correction to Gibbs Free Energy= 0.186059  
 Sum of electronic and zero-point Energies= -976.262480  
 Sum of electronic and thermal Energies= -976.250382  
 Sum of electronic and thermal Enthalpies= -976.249438  
 Sum of electronic and thermal Free Energies= -976.301336

5

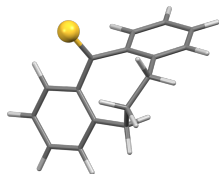

E(RB3LYP) = -1015.76004126 A.U.

| Center Number | Atomic Number | Atomic Type | Coordinates (Angstroms) |           |           |
|---------------|---------------|-------------|-------------------------|-----------|-----------|
|               |               |             | X                       | Y         | Z         |
| 1             | 6             | 0           | 1.360607                | -0.356621 | 0.025669  |
| 2             | 6             | 0           | 0.090824                | -0.880537 | 0.597387  |
| 3             | 6             | 0           | -3.195032               | 0.798007  | -0.392156 |
| 4             | 6             | 0           | -1.191965               | -0.517285 | -0.094780 |
| 5             | 1             | 0           | -3.819712               | 1.646274  | -0.097336 |
| 6             | 6             | 0           | -1.992389               | 0.575608  | 0.297987  |
| 7             | 6             | 0           | -3.607741               | -0.028676 | -1.438112 |
| 8             | 16            | 0           | 0.055740                | -1.932981 | 1.857810  |
| 9             | 1             | 0           | -4.551109               | 0.170449  | -1.952699 |
| 10            | 6             | 0           | -2.804269               | -1.103480 | -1.825299 |
| 11            | 6             | 0           | 1.548423                | 1.011820  | -0.311812 |
| 12            | 1             | 0           | -3.109147               | -1.757646 | -2.645951 |
| 13            | 6             | 0           | -1.602813               | -1.340504 | -1.157472 |
| 14            | 1             | 0           | -0.972090               | -2.182821 | -1.452425 |
| 15            | 6             | 0           | 2.409692                | -1.273259 | -0.194361 |
| 16            | 1             | 0           | 2.252838                | -2.314324 | 0.094021  |
| 17            | 6             | 0           | 3.610611                | -0.877817 | -0.777482 |
| 18            | 1             | 0           | 4.400474                | -1.611910 | -0.954081 |
| 19            | 6             | 0           | 3.793678                | 0.462202  | -1.126194 |
| 20            | 1             | 0           | 4.732029                | 0.793476  | -1.578406 |
| 21            | 6             | 0           | 2.777374                | 1.386329  | -0.876350 |
| 22            | 1             | 0           | 2.942660                | 2.440486  | -1.116451 |
| 23            | 1             | 0           | -0.255720               | 2.092280  | -0.789430 |
| 24            | 6             | 0           | 0.528409                | 2.097561  | -0.011857 |
| 25            | 6             | 0           | -0.124423               | 2.016727  | 1.391180  |
| 26            | 6             | 0           | -1.586922               | 1.500782  | 1.425549  |
| 27            | 1             | 0           | 1.041838                | 3.064428  | -0.121718 |
| 28            | 1             | 0           | -1.755802               | 0.991165  | 2.390511  |
| 29            | 1             | 0           | -2.277245               | 2.358996  | 1.414886  |
| 30            | 1             | 0           | -0.113580               | 3.017498  | 1.851162  |
| 31            | 1             | 0           | 0.508342                | 1.394202  | 2.041564  |

Temperature 298.150 Kelvin. Pressure 1.00000 Atm.  
 Zero-point correction= 0.253054 (Hartree/Particle)  
 Thermal correction to Energy= 0.266565  
 Thermal correction to Enthalpy= 0.267509  
 Thermal correction to Gibbs Free Energy= 0.212284  
 Sum of electronic and zero-point Energies= -1015.506987  
 Sum of electronic and thermal Energies= -1015.493476  
 Sum of electronic and thermal Enthalpies= -1015.492532  
 Sum of electronic and thermal Free Energies= -1015.547757

6

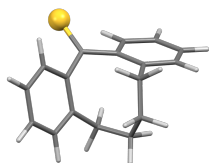

E(RB3LYP) = -1055.04356192 A.U.

| Center Number | Atomic Number | Atomic Type | Coordinates (Angstroms) |           |           |
|---------------|---------------|-------------|-------------------------|-----------|-----------|
|               |               |             | X                       | Y         | Z         |
| 1             | 6             | 0           | 1.317487                | 0.638794  | 0.018201  |
| 2             | 6             | 0           | 0.000004                | 1.351105  | -0.000002 |
| 3             | 6             | 0           | -2.886770               | -1.052276 | -0.785661 |
| 4             | 6             | 0           | -1.317480               | 0.638798  | -0.018203 |
| 5             | 1             | 0           | -3.088732               | -1.943955 | -1.386521 |
| 6             | 6             | 0           | -1.575622               | -0.545080 | -0.763253 |
| 7             | 6             | 0           | -3.926447               | -0.458144 | -0.073951 |
| 8             | 16            | 0           | 0.000006                | 3.009505  | -0.000002 |
| 9             | 1             | 0           | -4.931151               | -0.887331 | -0.109224 |
| 10            | 6             | 0           | -3.669918               | 0.690374  | 0.681659  |
| 11            | 6             | 0           | 1.575621                | -0.545091 | 0.763244  |
| 12            | 1             | 0           | -4.467732               | 1.168778  | 1.254905  |
| 13            | 6             | 0           | -2.389644               | 1.230795  | 0.691159  |
| 14            | 1             | 0           | -2.187874               | 2.139667  | 1.259044  |
| 15            | 6             | 0           | 2.389657                | 1.230794  | -0.691148 |
| 16            | 1             | 0           | 2.187894                | 2.139673  | -1.259024 |
| 17            | 6             | 0           | 3.669928                | 0.690366  | -0.681649 |
| 18            | 1             | 0           | 4.467747                | 1.168772  | -1.254885 |
| 19            | 6             | 0           | 3.926447                | -0.458163 | 0.073947  |
| 20            | 1             | 0           | 4.931149                | -0.887358 | 0.109218  |
| 21            | 6             | 0           | 2.886765                | -1.052294 | 0.785651  |
| 22            | 1             | 0           | 3.088721                | -1.943979 | 1.386505  |
| 23            | 6             | 0           | -0.517657               | -1.310863 | -1.526206 |
| 24            | 6             | 0           | 0.517653                | -1.310863 | 1.526204  |
| 25            | 6             | 0           | 0.039895                | -2.552969 | -0.769762 |
| 26            | 6             | 0           | -0.039925               | -2.552962 | 0.769768  |
| 27            | 1             | 0           | 0.307590                | -0.646423 | -1.804850 |
| 28            | 1             | 0           | -0.957468               | -1.655469 | -2.475911 |
| 29            | 1             | 0           | 1.087364                | -2.695294 | -1.080998 |
| 30            | 1             | 0           | -0.497526               | -3.452974 | -1.113246 |
| 31            | 1             | 0           | 0.497474                | -3.452977 | 1.113260  |
| 32            | 1             | 0           | -1.087398               | -2.695260 | 1.081003  |
| 33            | 1             | 0           | -0.307582               | -0.646411 | 1.804857  |
| 34            | 1             | 0           | 0.957469                | -1.655473 | 2.475905  |

Temperature 298.150 Kelvin. Pressure 1.00000 Atm.  
 Zero-point correction= 0.282647 (Hartree/Particle)  
 Thermal correction to Energy= 0.297035  
 Thermal correction to Enthalpy= 0.297979  
 Thermal correction to Gibbs Free Energy= 0.241061  
 Sum of electronic and zero-point Energies= -1054.760915  
 Sum of electronic and thermal Energies= -1054.746527  
 Sum of electronic and thermal Enthalpies= -1054.745583  
 Sum of electronic and thermal Free Energies= -1054.802501

# 1Mu

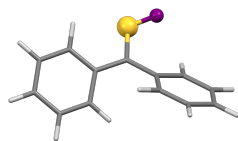

E(UB3LYP) = -899.704907731 A.U.

| Center Number | Atomic Number | Atomic Type | Coordinates (Angstroms) |           |           |
|---------------|---------------|-------------|-------------------------|-----------|-----------|
|               |               |             | X                       | Y         | Z         |
| 1             | 6             | 0           | -0.003628               | 0.782467  | 0.020867  |
| 2             | 6             | 0           | 1.284664                | 0.101012  | 0.026185  |
| 3             | 6             | 0           | 1.440588                | -1.153877 | 0.673409  |
| 4             | 6             | 0           | 2.441562                | 0.673806  | -0.562343 |
| 5             | 6             | 0           | 2.676510                | -1.793331 | 0.720498  |
| 6             | 1             | 0           | 0.581247                | -1.608650 | 1.169035  |
| 7             | 6             | 0           | 3.674396                | 0.025851  | -0.514655 |
| 8             | 1             | 0           | 2.353241                | 1.626643  | -1.087993 |
| 9             | 6             | 0           | 3.803514                | -1.211521 | 0.125832  |
| 10            | 1             | 0           | 2.765537                | -2.752000 | 1.238517  |
| 11            | 1             | 0           | 4.542916                | 0.488036  | -0.991524 |
| 12            | 1             | 0           | 4.771852                | -1.716318 | 0.164394  |
| 13            | 6             | 0           | -1.290528               | 0.102406  | -0.015702 |
| 14            | 6             | 0           | -1.426553               | -1.175036 | -0.624366 |
| 15            | 6             | 0           | -2.468046               | 0.696205  | 0.511452  |
| 16            | 6             | 0           | -2.659165               | -1.819145 | -0.684219 |
| 17            | 1             | 0           | -0.553435               | -1.645663 | -1.079001 |
| 18            | 6             | 0           | -3.697029               | 0.044558  | 0.448025  |
| 19            | 1             | 0           | -2.398237               | 1.672928  | 0.993622  |
| 20            | 6             | 0           | -3.804664               | -1.218173 | -0.146951 |
| 21            | 1             | 0           | -2.730878               | -2.796752 | -1.168465 |
| 22            | 1             | 0           | -4.581624               | 0.524559  | 0.875072  |
| 23            | 1             | 0           | -4.770758               | -1.726393 | -0.196056 |
| 24            | 16            | 0           | -0.056275               | 2.551084  | -0.027551 |
| 25            | 1             | 0           | 1.090830                | 2.784918  | 0.655011  |

Temperature 298.150 Kelvin. Pressure 1.00000 Atm.  
Zero-point correction= 0.196670 (Hartree/Particle)  
Thermal correction to Energy= 0.208337  
Thermal correction to Enthalpy= 0.209281  
Thermal correction to Gibbs Free Energy= 0.157450  
Sum of electronic and zero-point Energies= -899.508238  
Sum of electronic and thermal Energies= -899.496571  
Sum of electronic and thermal Enthalpies= -899.495627  
Sum of electronic and thermal Free Energies= -899.547457

## Vibrational averaging

[Input (inpart)]

# freq=(anharmonic,readanharm) ub3lyp/def2svp

|                                       |             |                   |                   |                   |
|---------------------------------------|-------------|-------------------|-------------------|-------------------|
| 0 2                                   |             |                   |                   |                   |
| C                                     | -0.00362800 | 0.78246700        | 0.02086700        |                   |
| C                                     | 1.28466400  | 0.10101200        | 0.02618500        |                   |
| C                                     | 1.44058800  | -1.15387700       | 0.67340900        |                   |
| C                                     | 2.44156200  | 0.67380600        | -0.56234300       |                   |
| C                                     | 2.67651000  | -1.79333100       | 0.72049800        |                   |
| H                                     | 0.58124700  | -1.60865000       | 1.16903500        |                   |
| C                                     | 3.67439600  | 0.02585100        | -0.51465500       |                   |
| H                                     | 2.35324100  | 1.62664300        | -1.08799300       |                   |
| C                                     | 3.80351400  | -1.21152100       | 0.12583200        |                   |
| H                                     | 2.76553700  | -2.75200000       | 1.23851700        |                   |
| H                                     | 4.54291600  | 0.48803600        | -0.99152400       |                   |
| H                                     | 4.77185200  | -1.71631800       | 0.16439400        |                   |
| C                                     | -1.29052800 | 0.10240600        | -0.01570200       |                   |
| C                                     | -1.42655300 | -1.17503600       | -0.62436600       |                   |
| C                                     | -2.46804600 | 0.69620500        | 0.51145200        |                   |
| C                                     | -2.65916500 | -1.81914500       | -0.68421900       |                   |
| H                                     | -0.55343500 | -1.64566300       | -1.07900100       |                   |
| C                                     | -3.69702900 | 0.04455800        | 0.44802500        |                   |
| H                                     | -2.39823700 | 1.67292800        | 0.99362200        |                   |
| C                                     | -3.80466400 | -1.21817300       | -0.14695100       |                   |
| H                                     | -2.73087800 | -2.79675200       | -1.16846500       |                   |
| H                                     | -4.58162400 | 0.52455900        | 0.87507200        |                   |
| H                                     | -4.77075800 | -1.72639300       | -0.19605600       |                   |
| S                                     | -0.05627500 | 2.55108400        | -0.02755100       |                   |
| <b>H(Iso=0.113429,NMagM=8.890597)</b> |             | <b>1.09083000</b> | <b>2.78491800</b> | <b>0.65501100</b> |

Property=Fermi

[Output (in part)]

Fermi contact terms

-----  
Property at reference geometry  
-----

| Atom           | Isotropic Fermi Contact Couplings |                 |                 | 10(-4) cm <sup>-1</sup> |
|----------------|-----------------------------------|-----------------|-----------------|-------------------------|
|                | a.u.                              | MegaHertz       | Gauss           |                         |
| 1 C(13)        | 0.12595                           | 141.59457       | 50.52446        | 47.23086                |
| 2 C(13)        | -0.04217                          | -47.40424       | -16.91501       | -15.81235               |
| 3 C(13)        | 0.03056                           | 34.36027        | 12.26060        | 11.46135                |
| 4 C(13)        | 0.02984                           | 33.54469        | 11.96958        | 11.18930                |
| 5 C(13)        | -0.01765                          | -19.83958       | -7.07926        | -6.61777                |
| 6 H(1)         | -0.00182                          | -8.13201        | -2.90170        | -2.71255                |
| 7 C(13)        | -0.01801                          | -20.24346       | -7.22337        | -6.75249                |
| 8 H(1)         | -0.00201                          | -8.99274        | -3.20883        | -2.99965                |
| 9 C(13)        | 0.02628                           | 29.53849        | 10.54007        | 9.85298                 |
| 10 H(1)        | 0.00090                           | 4.00644         | 1.42960         | 1.33641                 |
| 11 H(1)        | 0.00100                           | 4.48445         | 1.60016         | 1.49585                 |
| 12 H(1)        | -0.00204                          | -9.13727        | -3.26040        | -3.04786                |
| 13 C(13)       | -0.04484                          | -50.41021       | -17.98762       | -16.81504               |
| 14 C(13)       | 0.03244                           | 36.46518        | 13.01168        | 12.16348                |
| 15 C(13)       | 0.03114                           | 35.00866        | 12.49196        | 11.67763                |
| 16 C(13)       | -0.01978                          | -22.23551       | -7.93418        | -7.41697                |
| 17 H(1)        | -0.00204                          | -9.12684        | -3.25668        | -3.04439                |
| 18 C(13)       | -0.02024                          | -22.75472       | -8.11945        | -7.59016                |
| 19 H(1)        | -0.00213                          | -9.51201        | -3.39412        | -3.17287                |
| 20 C(13)       | 0.02937                           | 33.01428        | 11.78032        | 11.01238                |
| 21 H(1)        | 0.00099                           | 4.42673         | 1.57957         | 1.47660                 |
| 22 H(1)        | 0.00107                           | 4.76857         | 1.70154         | 1.59062                 |
| 23 H(1)        | -0.00228                          | -10.17464       | -3.63056        | -3.39389                |
| 24 S(33)       | 0.02124                           | 7.29368         | 2.60257         | 2.43291                 |
| <b>25 H(1)</b> | <b>0.00332</b>                    | <b>47.18926</b> | <b>16.83830</b> | <b>15.74064</b>         |

-----  
Temperature: 0K  
-----

| Atom           | Isotropic Fermi Contact Couplings |                 |                 | 10(-4) cm <sup>-1</sup> |
|----------------|-----------------------------------|-----------------|-----------------|-------------------------|
|                | a.u.                              | MegaHertz       | Gauss           |                         |
| 1 C(13)        | 0.14219                           | 159.85229       | 57.03927        | 53.32099                |
| 2 C(13)        | -0.05200                          | -58.45798       | -20.85926       | -19.49948               |
| 3 C(13)        | 0.04055                           | 45.58966        | 16.26752        | 15.20707                |
| 4 C(13)        | 0.03958                           | 44.49665        | 15.87751        | 14.84248                |
| 5 C(13)        | -0.02166                          | -24.34648       | -8.68743        | -8.12111                |
| 6 H(1)         | -0.00241                          | -10.75668       | -3.83825        | -3.58804                |
| 7 C(13)        | -0.02197                          | -24.70177       | -8.81421        | -8.23963                |
| 8 H(1)         | -0.00255                          | -11.38982       | -4.06417        | -3.79923                |
| 9 C(13)        | 0.03043                           | 34.21162        | 12.20756        | 11.41177                |
| 10 H(1)        | 0.00122                           | 5.44380         | 1.94248         | 1.81586                 |
| 11 H(1)        | 0.00134                           | 6.01060         | 2.14473         | 2.00492                 |
| 12 H(1)        | -0.00211                          | -9.44518        | -3.37028        | -3.15057                |
| 13 C(13)       | -0.04809                          | -54.06061       | -19.29017       | -18.03268               |
| 14 C(13)       | 0.03482                           | 39.14386        | 13.96750        | 13.05699                |
| 15 C(13)       | 0.03394                           | 38.15251        | 13.61377        | 12.72631                |
| 16 C(13)       | -0.01591                          | -17.88142       | -6.38053        | -5.96460                |
| 17 H(1)        | -0.00207                          | -9.23078        | -3.29377        | -3.07906                |
| 18 C(13)       | -0.01657                          | -18.63237       | -6.64849        | -6.21509                |
| 19 H(1)        | -0.00221                          | -9.88692        | -3.52790        | -3.29792                |
| 20 C(13)       | 0.02537                           | 28.52128        | 10.17710        | 9.51368                 |
| 21 H(1)        | 0.00074                           | 3.30422         | 1.17903         | 1.10217                 |
| 22 H(1)        | 0.00083                           | 3.72394         | 1.32879         | 1.24217                 |
| 23 H(1)        | -0.00170                          | -7.59540        | -2.71023        | -2.53355                |
| 24 S(33)       | 0.02680                           | 9.20582         | 3.28486         | 3.07073                 |
| <b>25 H(1)</b> | <b>0.00660</b>                    | <b>93.93226</b> | <b>33.51737</b> | <b>31.33243</b>         |

-----  
Temperature: 298K  
-----

|    |       | Isotropic Fermi Contact Couplings |                  |                 |                 |
|----|-------|-----------------------------------|------------------|-----------------|-----------------|
|    | Atom  | a.u.                              | MegaHertz        | Gauss           | 10(-4) cm-1     |
| 1  | C(13) | 0.16789                           | 188.74250        | 67.34802        | 62.95772        |
| 2  | C(13) | -0.07479                          | -84.08229        | -30.00265       | -28.04683       |
| 3  | C(13) | 0.05931                           | 66.67388         | 23.79090        | 22.24001        |
| 4  | C(13) | 0.05707                           | 64.16240         | 22.89474        | 21.40227        |
| 5  | C(13) | -0.02887                          | -32.45429        | -11.58050       | -10.82559       |
| 6  | H(1)  | -0.00369                          | -16.49636        | -5.88631        | -5.50259        |
| 7  | C(13) | -0.02907                          | -32.67799        | -11.66032       | -10.90020       |
| 8  | H(1)  | -0.00376                          | -16.81523        | -6.00009        | -5.60896        |
| 9  | C(13) | 0.03356                           | 37.72807         | 13.46231        | 12.58473        |
| 10 | H(1)  | 0.00176                           | 7.85230          | 2.80189         | 2.61924         |
| 11 | H(1)  | 0.00194                           | 8.67745          | 3.09633         | 2.89449         |
| 12 | H(1)  | -0.00208                          | -9.27856         | -3.31082        | -3.09499        |
| 13 | C(13) | -0.05471                          | -61.49938        | -21.94451       | -20.51399       |
| 14 | C(13) | 0.03264                           | 36.69208         | 13.09265        | 12.23916        |
| 15 | C(13) | 0.03225                           | 36.25358         | 12.93618        | 12.09289        |
| 16 | C(13) | -0.00160                          | -1.79534         | -0.64062        | -0.59886        |
| 17 | H(1)  | -0.00181                          | -8.07314         | -2.88070        | -2.69291        |
| 18 | C(13) | -0.00286                          | -3.21628         | -1.14765        | -1.07284        |
| 19 | H(1)  | -0.00210                          | -9.37389         | -3.34484        | -3.12679        |
| 20 | C(13) | 0.00553                           | 6.21549          | 2.21784         | 2.07326         |
| 21 | H(1)  | -0.00024                          | -1.08507         | -0.38718        | -0.36194        |
| 22 | H(1)  | -0.00012                          | -0.52511         | -0.18737        | -0.17516        |
| 23 | H(1)  | 0.00011                           | 0.51193          | 0.18267         | 0.17076         |
| 24 | S(33) | 0.02737                           | 9.40035          | 3.35428         | 3.13562         |
| 25 | H(1)  | <b>0.00781</b>                    | <b>111.09204</b> | <b>39.64040</b> | <b>37.05632</b> |

### 4Mu

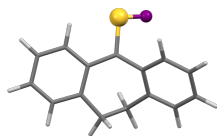

E(UB3LYP) = -977.585993814035 A.U.

| Center Number | Atomic Number | Atomic Type | Coordinates (Angstroms) |           |           |
|---------------|---------------|-------------|-------------------------|-----------|-----------|
|               |               |             | X                       | Y         | Z         |
| 1             | 16            | 0           | 0.044756                | 2.649412  | 0.536475  |
| 2             | 6             | 0           | 0.023194                | 0.896470  | 0.157394  |
| 3             | 6             | 0           | 1.326410                | 0.273364  | -0.004478 |
| 4             | 6             | 0           | 2.473747                | 1.116524  | -0.080389 |
| 5             | 6             | 0           | 3.754034                | 0.635072  | -0.297141 |
| 6             | 6             | 0           | 3.964440                | -0.737193 | -0.438547 |
| 7             | 6             | 0           | 2.868407                | -1.591416 | -0.340966 |
| 8             | 6             | 0           | 1.563313                | -1.135413 | -0.130302 |
| 9             | 6             | 0           | 0.494364                | -2.200232 | 0.000037  |
| 10            | 6             | 0           | -0.610128               | -1.881770 | 1.024797  |
| 11            | 6             | 0           | -1.653086               | -0.987426 | 0.414041  |
| 12            | 6             | 0           | -2.959357               | -1.454322 | 0.248315  |
| 13            | 6             | 0           | -3.943712               | -0.685786 | -0.372607 |
| 14            | 6             | 0           | -3.610355               | 0.580349  | -0.854139 |
| 15            | 6             | 0           | -2.318732               | 1.066952  | -0.688945 |
| 16            | 6             | 0           | -1.307477               | 0.309301  | -0.048633 |
| 17            | 1             | 0           | -1.219613               | 2.712032  | 0.997644  |
| 18            | 1             | 0           | 2.352729                | 2.189727  | 0.015829  |
| 19            | 1             | 0           | 4.585313                | 1.332388  | -0.355971 |
| 20            | 1             | 0           | 4.960679                | -1.136894 | -0.604792 |
| 21            | 1             | 0           | 3.026688                | -2.664868 | -0.418713 |
| 22            | 1             | 0           | 0.988852                | -3.137698 | 0.280180  |
| 23            | 1             | 0           | 0.019621                | -2.389158 | -0.973926 |
| 24            | 1             | 0           | -0.160182               | -1.419503 | 1.913505  |
| 25            | 1             | 0           | -1.081131               | -2.814535 | 1.353706  |
| 26            | 1             | 0           | -3.207186               | -2.445814 | 0.620735  |
| 27            | 1             | 0           | -4.952070               | -1.074378 | -0.484830 |
| 28            | 1             | 0           | -4.351795               | 1.188715  | -1.365148 |
| 29            | 1             | 0           | -2.068380               | 2.042542  | -1.092442 |

Zero-point correction= 0.233418 (Hartree/Particle)  
 Thermal correction to Energy= 0.246170  
 Thermal correction to Enthalpy= 0.247114  
 Thermal correction to Gibbs Free Energy= 0.193238  
 Sum of electronic and zero-point Energies= -977.352576  
 Sum of electronic and thermal Energies= -977.339824  
 Sum of electronic and thermal Enthalpies= -977.338880  
 Sum of electronic and thermal Free Energies= -977.392756

## Vibrational averaging

[Input (inpart)]

# freq=(anharmonic,readanharmon) ub3lyp/6-31g(d)

```
0 2
S          0.04476   2.64941   0.53648
C          0.02319   0.89647   0.15739
C          1.32641   0.27336  -0.00448
C          2.47375   1.11652  -0.08039
C          3.75403   0.63507  -0.29714
C          3.96444  -0.73719  -0.43855
C          2.86841  -1.59142  -0.34097
C          1.56331  -1.13541  -0.1303
C          0.49436  -2.20023   0.00004
C         -0.61013  -1.88177   1.0248
C         -1.65309  -0.98743   0.41404
C         -2.95936  -1.45432   0.24832
C         -3.94371  -0.68579  -0.37261
C         -3.61036   0.58035  -0.85414
C         -2.31873   1.06695  -0.68895
C         -1.30748   0.3093   -0.04863
H(Iso=0.113429,NMagM=8.890597) -1.21961   2.71203   0.99764
H          2.35273   2.18973   0.01583
H          4.58531   1.33239  -0.35597
H          4.96068  -1.13689  -0.60479
H          3.02669  -2.66487  -0.41871
H          0.98885  -3.1377   0.28018
H          0.01962  -2.38916  -0.97393
H         -0.16018  -1.4195   1.91351
H         -1.08113  -2.81454   1.35371
H         -3.20719  -2.44581   0.62074
H         -4.95207  -1.07438  -0.48483
H         -4.3518   1.18872  -1.36515
H         -2.06838   2.04254  -1.09244
```

Property=Fermi

[Output (in part)]

Fermi contact terms

-----  
Property at reference geometry  
-----

| Atom           | Isotropic Fermi Contact Couplings |                 |                |                |
|----------------|-----------------------------------|-----------------|----------------|----------------|
|                | a.u.                              | MegaHertz       | Gauss          | 10(-4) cm-1    |
| 1 S(33)        | 0.01230                           | 4.22349         | 1.50704        | 1.40880        |
| 2 C(13)        | 0.08099                           | 91.04671        | 32.48773       | 30.36991       |
| 3 C(13)        | -0.02964                          | -33.31597       | -11.88797      | -11.11301      |
| 4 C(13)        | 0.02240                           | 25.17839        | 8.98428        | 8.39861        |
| 5 C(13)        | -0.01349                          | -15.16264       | -5.41041       | -5.05771       |
| 6 C(13)        | 0.02059                           | 23.14919        | 8.26021        | 7.72174        |
| 7 C(13)        | -0.01442                          | -16.20765       | -5.78329       | -5.40629       |
| 8 C(13)        | 0.02191                           | 24.63381        | 8.78996        | 8.21695        |
| 9 C(13)        | -0.00035                          | -0.39624        | -0.14139       | -0.13217       |
| 10 C(13)       | -0.00051                          | -0.57059        | -0.20360       | -0.19033       |
| 11 C(13)       | 0.02114                           | 23.77093        | 8.48206        | 7.92913        |
| 12 C(13)       | -0.00791                          | -8.88744        | -3.17126       | -2.96453       |
| 13 C(13)       | 0.01277                           | 14.35647        | 5.12275        | 4.78880        |
| 14 C(13)       | -0.00818                          | -9.19539        | -3.28114       | -3.06725       |
| 15 C(13)       | 0.01802                           | 20.25960        | 7.22913        | 6.75787        |
| 16 C(13)       | -0.02453                          | -27.58143       | -9.84174       | -9.20018       |
| <b>17 H(1)</b> | <b>0.00153</b>                    | <b>21.82610</b> | <b>7.78810</b> | <b>7.28040</b> |
| 18 H(1)        | -0.00270                          | -12.07842       | -4.30988       | -4.02893       |
| 19 H(1)        | 0.00116                           | 5.16992         | 1.84476        | 1.72450        |
| 20 H(1)        | -0.00287                          | -12.81291       | -4.57196       | -4.27393       |
| 21 H(1)        | 0.00123                           | 5.49794         | 1.96180        | 1.83391        |
| 22 H(1)        | 0.00172                           | 7.69527         | 2.74586        | 2.56687        |
| 23 H(1)        | 0.00476                           | 21.29532        | 7.59870        | 7.10336        |
| 24 H(1)        | 0.00086                           | 3.86617         | 1.37955        | 1.28962        |
| 25 H(1)        | 0.00000                           | -0.00351        | -0.00125       | -0.00117       |
| 26 H(1)        | 0.00080                           | 3.57705         | 1.27638        | 1.19317        |
| 27 H(1)        | -0.00178                          | -7.97779        | -2.84667       | -2.66110       |
| 28 H(1)        | 0.00103                           | 4.58240         | 1.63511        | 1.52852        |
| 29 H(1)        | -0.00184                          | -8.22583        | -2.93518       | -2.74384       |

-----  
Temperature: 0K  
-----

| Atom           | Isotropic Fermi Contact Couplings |                 |                 |                 |
|----------------|-----------------------------------|-----------------|-----------------|-----------------|
|                | a.u.                              | MegaHertz       | Gauss           | 10(-4) cm-1     |
| 1 S(33)        | 0.02133                           | 7.32555         | 2.61394         | 2.44354         |
| 2 C(13)        | 0.09872                           | 110.98192       | 39.60111        | 37.01958        |
| 3 C(13)        | -0.03013                          | -33.87485       | -12.08739       | -11.29943       |
| 4 C(13)        | 0.01926                           | 21.65608        | 7.72743         | 7.22369         |
| 5 C(13)        | -0.00392                          | -4.40777        | -1.57280        | -1.47027        |
| 6 C(13)        | 0.00963                           | 10.82486        | 3.86258         | 3.61079         |
| 7 C(13)        | -0.00404                          | -4.54734        | -1.62260        | -1.51683        |
| 8 C(13)        | 0.01704                           | 19.15262        | 6.83413         | 6.38862         |
| 9 C(13)        | 0.00391                           | 4.39953         | 1.56986         | 1.46753         |
| 10 C(13)       | -0.00452                          | -5.08251        | -1.81357        | -1.69534        |
| 11 C(13)       | 0.03747                           | 42.12898        | 15.03267        | 14.05272        |
| 12 C(13)       | -0.02015                          | -22.65331       | -8.08326        | -7.55633        |
| 13 C(13)       | 0.02496                           | 28.05812        | 10.01183        | 9.35918         |
| 14 C(13)       | -0.02049                          | -23.02965       | -8.21755        | -7.68186        |
| 15 C(13)       | 0.03486                           | 39.18558        | 13.98239        | 13.07090        |
| 16 C(13)       | -0.04196                          | -47.16726       | -16.83045       | -15.73330       |
| 17 H(1)        | 0.00505                           | 71.79278        | 25.61745        | 23.94749        |
| <b>18 H(1)</b> | <b>-0.00200</b>                   | <b>-8.95704</b> | <b>-3.19609</b> | <b>-2.98775</b> |
| 19 H(1)        | -0.00001                          | -0.05203        | -0.01857        | -0.01736        |
| 20 H(1)        | -0.00094                          | -4.19045        | -1.49526        | -1.39778        |
| 21 H(1)        | -0.00001                          | -0.03622        | -0.01292        | -0.01208        |

|    |      |          |           |          |          |
|----|------|----------|-----------|----------|----------|
| 22 | H(1) | 0.00180  | 8.04616   | 2.87107  | 2.68391  |
| 23 | H(1) | 0.00404  | 18.06817  | 6.44717  | 6.02689  |
| 24 | H(1) | 0.00196  | 8.77795   | 3.13219  | 2.92801  |
| 25 | H(1) | 0.00027  | 1.19664   | 0.42699  | 0.39915  |
| 26 | H(1) | 0.00248  | 11.09406  | 3.95864  | 3.70058  |
| 27 | H(1) | -0.00318 | -14.21503 | -5.07227 | -4.74162 |
| 28 | H(1) | 0.00281  | 12.54251  | 4.47548  | 4.18373  |
| 29 | H(1) | -0.00381 | -17.03482 | -6.07845 | -5.68220 |

-----  
Temperature: 298K  
-----

| Atom | Isotropic Fermi Contact Couplings |                |                  |                 |                 |
|------|-----------------------------------|----------------|------------------|-----------------|-----------------|
|      | a.u.                              | MegaHertz      | Gauss            | 10(-4) cm-1     |                 |
| 1    | S(33)                             | 0.03317        | 11.39435         | 4.06579         | 3.80075         |
| 2    | C(13)                             | 0.14180        | 159.41110        | 56.88184        | 53.17382        |
| 3    | C(13)                             | -0.02971       | -33.39949        | -11.91777       | -11.14087       |
| 4    | C(13)                             | -0.00319       | -3.58102         | -1.27780        | -1.19450        |
| 5    | C(13)                             | 0.03376        | 37.95695         | 13.54398        | 12.66107        |
| 6    | C(13)                             | -0.03849       | -43.26586        | -15.43834       | -14.43194       |
| 7    | C(13)                             | 0.03705        | 41.65220         | 14.86254        | 13.89368        |
| 8    | C(13)                             | -0.00861       | -9.67762         | -3.45321        | -3.22810        |
| 9    | C(13)                             | 0.02014        | 22.63902         | 8.07817         | 7.55156         |
| 10   | C(13)                             | -0.01879       | -21.12264        | -7.53708        | -7.04575        |
| 11   | C(13)                             | 0.09217        | 103.61233        | 36.97146        | 34.56135        |
| 12   | C(13)                             | -0.06397       | -71.91403        | -25.66071       | -23.98794       |
| 13   | C(13)                             | 0.06589        | 74.07057         | 26.43022        | 24.70728        |
| 14   | C(13)                             | -0.06456       | -72.57468        | -25.89645       | -24.20831       |
| 15   | C(13)                             | 0.08938        | 100.47848        | 35.85322        | 33.51601        |
| 16   | C(13)                             | -0.10416       | -117.10078       | -41.78447       | -39.06062       |
| 17   | <b>H(1)</b>                       | <b>0.00853</b> | <b>121.40559</b> | <b>43.32053</b> | <b>40.49654</b> |
| 18   | H(1)                              | 0.00095        | 4.23501          | 1.51116         | 1.41265         |
| 19   | H(1)                              | -0.00473       | -21.14138        | -7.54377        | -7.05201        |
| 20   | H(1)                              | 0.00643        | 28.72792         | 10.25084        | 9.58260         |
| 21   | H(1)                              | -0.00503       | -22.46807        | -8.01717        | -7.49454        |
| 22   | H(1)                              | 0.00096        | 4.29218          | 1.53156         | 1.43172         |
| 23   | H(1)                              | -0.00028       | -1.23319         | -0.44003        | -0.41135        |
| 24   | H(1)                              | 0.00609        | 27.20726         | 9.70823         | 9.07537         |
| 25   | H(1)                              | 0.00127        | 5.68444          | 2.02835         | 1.89613         |
| 26   | H(1)                              | 0.00829        | 37.05788         | 13.22317        | 12.36118        |
| 27   | H(1)                              | -0.00823       | -36.77728        | -13.12305       | -12.26758       |
| 28   | H(1)                              | 0.00892        | 39.89124         | 14.23419        | 13.30629        |
| 29   | H(1)                              | -0.01097       | -49.05259        | -17.50318       | -16.36218       |

## 5Mu

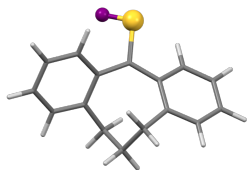

E(UB3LYP) = -1016.89725440 A.U.

| Center Number | Atomic Number | Atomic Type | Coordinates (Angstroms) |           |           |
|---------------|---------------|-------------|-------------------------|-----------|-----------|
|               |               |             | X                       | Y         | Z         |
| 1             | 16            | 0           | 0.054959                | 2.831313  | 0.054478  |
| 2             | 6             | 0           | 0.012534                | 1.041409  | 0.030287  |
| 3             | 6             | 0           | -1.319396               | 0.429404  | -0.027853 |
| 4             | 6             | 0           | -2.373574               | 1.127515  | -0.676702 |
| 5             | 6             | 0           | -3.685342               | 0.673066  | -0.672063 |
| 6             | 6             | 0           | -4.009050               | -0.507124 | -0.002107 |
| 7             | 6             | 0           | -2.989996               | -1.227427 | 0.618857  |
| 8             | 6             | 0           | -1.657485               | -0.803357 | 0.612753  |
| 9             | 6             | 0           | -0.621463               | -1.727635 | 1.203018  |
| 10            | 6             | 0           | -0.018720               | -2.624779 | 0.100154  |
| 11            | 6             | 0           | 0.568082                | -1.804691 | -1.068819 |
| 12            | 6             | 0           | 1.629955                | -0.849308 | -0.579242 |
| 13            | 6             | 0           | 2.957205                | -1.283678 | -0.643649 |
| 14            | 6             | 0           | 4.021525                | -0.536153 | -0.142375 |
| 15            | 6             | 0           | 3.749258                | 0.689230  | 0.466727  |
| 16            | 6             | 0           | 2.443896                | 1.151487  | 0.538424  |
| 17            | 6             | 0           | 1.337530                | 0.425836  | 0.009603  |
| 18            | 1             | 0           | -1.137421               | 3.029986  | 0.654872  |
| 19            | 1             | 0           | -2.137745               | 2.033260  | -1.224486 |
| 20            | 1             | 0           | -4.451248               | 1.239706  | -1.194984 |
| 21            | 1             | 0           | -5.033464               | -0.867682 | 0.028372  |
| 22            | 1             | 0           | -3.229164               | -2.157686 | 1.130004  |
| 23            | 1             | 0           | -1.085507               | -2.361559 | 1.967455  |
| 24            | 1             | 0           | 0.176158                | -1.165133 | 1.698101  |
| 25            | 1             | 0           | -0.796199               | -3.296512 | -0.286605 |
| 26            | 1             | 0           | 0.768087                | -3.254831 | 0.534819  |
| 27            | 1             | 0           | -0.236361               | -1.273953 | -1.587019 |
| 28            | 1             | 0           | 1.010437                | -2.493494 | -1.797657 |
| 29            | 1             | 0           | 3.156649                | -2.247024 | -1.108310 |
| 30            | 1             | 0           | 5.039201                | -0.908611 | -0.218941 |
| 31            | 1             | 0           | 4.551634                | 1.285114  | 0.893527  |
| 32            | 1             | 0           | 2.255836                | 2.094634  | 1.037130  |

Zero-point correction= 0.262879 (Hartree/Particle)  
 Thermal correction to Energy= 0.276472  
 Thermal correction to Enthalpy= 0.277416  
 Thermal correction to Gibbs Free Energy= 0.221960  
 Sum of electronic and zero-point Energies= -1016.634376  
 Sum of electronic and thermal Energies= -1016.620783  
 Sum of electronic and thermal Enthalpies= -1016.619839  
 Sum of electronic and thermal Free Energies= -1016.675294

## Vibrational averaging

[Input (inpart)]

# freq=(anharmonic,readanharmonic) ub3lyp/6-31g(d)

```
0 2
S          0.05498   2.83131   0.05444
C          0.01253   1.04141   0.03031
C         -1.3194    0.4294   -0.02786
C         -2.37358   1.12754  -0.67668
C         -3.68535   0.67309  -0.67205
C         -4.00906  -0.50712  -0.00214
C          -2.99    -1.22745   0.6188
C         -1.65749  -0.80339   0.61271
C         -0.62148  -1.72769   1.20295
C         -0.01871  -2.62478   0.10006
C          0.56811  -1.80464  -1.06887
C          1.62997  -0.84928  -0.57924
C          2.95722  -1.28366  -0.64361
C          4.02152  -0.53615  -0.14227
C          3.74924   0.68922   0.46686
C          2.44387   1.15147   0.53853
C          1.33753   0.42583   0.00965
H(Iso=0.113429,NMagM=8.890597) -1.13738   3.03001   0.65486
H          -2.13776   2.0333   -1.22443
H          -4.45125   1.23976  -1.19495
H          -5.03347  -0.86768   0.02833
H          -3.22918  -2.15773   1.12991
H          -1.08554  -2.36165   1.96735
H           0.17613  -1.16521   1.69808
H          -0.79617  -3.29651  -0.28674
H           0.7681   -3.25484   0.53472
H          -0.23633  -1.27388  -1.58705
H           1.01046  -2.49341  -1.79774
H           3.15668  -2.24698  -1.10831
H           5.0392  -0.9086   -0.21881
H           4.5516   1.28509   0.89371
H           2.25579   2.0946   1.03725
```

Property=Fermi

[Output (in part)]

Fermi contact terms

-----  
Property at reference geometry  
-----

|           | Atom        | Isotropic Fermi Contact Couplings |                 |                 | 10(-4) cm <sup>-1</sup> |
|-----------|-------------|-----------------------------------|-----------------|-----------------|-------------------------|
|           |             | a.u.                              | MegaHertz       | Gauss           |                         |
| 1         | S(33)       | 0.01317                           | 4.52262         | 1.61378         | 1.50859                 |
| 2         | C(13)       | 0.07931                           | 89.16420        | 31.81600        | 29.74197                |
| 3         | C(13)       | -0.02633                          | -29.59553       | -10.56042       | -9.87201                |
| 4         | C(13)       | 0.01692                           | 19.02525        | 6.78868         | 6.34614                 |
| 5         | C(13)       | -0.01026                          | -11.53194       | -4.11488        | -3.84664                |
| 6         | C(13)       | 0.01538                           | 17.29525        | 6.17137         | 5.76907                 |
| 7         | C(13)       | -0.01047                          | -11.77452       | -4.20144        | -3.92756                |
| 8         | C(13)       | 0.02417                           | 27.16722        | 9.69394         | 9.06201                 |
| 9         | C(13)       | -0.00399                          | -4.48664        | -1.60094        | -1.49658                |
| 10        | C(13)       | 0.00544                           | 6.11803         | 2.18307         | 2.04076                 |
| 11        | C(13)       | -0.00460                          | -5.16843        | -1.84423        | -1.72400                |
| 12        | C(13)       | 0.02468                           | 27.74010        | 9.89836         | 9.25310                 |
| 13        | C(13)       | -0.01290                          | -14.50063       | -5.17418        | -4.83689                |
| 14        | C(13)       | 0.01887                           | 21.21120        | 7.56868         | 7.07529                 |
| 15        | C(13)       | -0.01292                          | -14.52930       | -5.18442        | -4.84645                |
| 16        | C(13)       | 0.01843                           | 20.71413        | 7.39132         | 6.90949                 |
| 17        | C(13)       | -0.02863                          | -32.18852       | -11.48567       | -10.73694               |
| <b>18</b> | <b>H(1)</b> | <b>0.00206</b>                    | <b>29.37990</b> | <b>10.48348</b> | <b>9.80008</b>          |
| 19        | H(1)        | -0.00216                          | -9.63305        | -3.43731        | -3.21324                |
| 20        | H(1)        | 0.00113                           | 5.06014         | 1.80558         | 1.68788                 |
| 21        | H(1)        | -0.00215                          | -9.59241        | -3.42281        | -3.19968                |
| 22        | H(1)        | 0.00089                           | 3.98355         | 1.42143         | 1.32877                 |
| 23        | H(1)        | 0.00074                           | 3.31182         | 1.18174         | 1.10470                 |
| 24        | H(1)        | 0.00074                           | 3.28918         | 1.17366         | 1.09715                 |
| 25        | H(1)        | 0.00056                           | 2.50427         | 0.89358         | 0.83533                 |
| 26        | H(1)        | 0.00044                           | 1.97207         | 0.70368         | 0.65781                 |
| 27        | H(1)        | 0.00109                           | 4.87840         | 1.74073         | 1.62726                 |
| 28        | H(1)        | 0.00073                           | 3.26715         | 1.16580         | 1.08980                 |
| 29        | H(1)        | 0.00105                           | 4.68315         | 1.67107         | 1.56213                 |
| 30        | H(1)        | -0.00262                          | -11.70547       | -4.17680        | -3.90452                |
| 31        | H(1)        | 0.00123                           | 5.51772         | 1.96886         | 1.84051                 |
| 32        | H(1)        | -0.00252                          | -11.24658       | -4.01306        | -3.75146                |

-----  
Temperature:        0K  
-----

|           | Atom        | Isotropic Fermi Contact Couplings |                 |                 | 10(-4) cm <sup>-1</sup> |
|-----------|-------------|-----------------------------------|-----------------|-----------------|-------------------------|
|           |             | a.u.                              | MegaHertz       | Gauss           |                         |
| 1         | S(33)       | 0.02020                           | 6.93855         | 2.47585         | 2.31445                 |
| 2         | C(13)       | 0.10281                           | 115.58171       | 41.24243        | 38.55391                |
| 3         | C(13)       | -0.04293                          | -48.26376       | -17.22171       | -16.09906               |
| 4         | C(13)       | 0.02981                           | 33.50696        | 11.95612        | 11.17672                |
| 5         | C(13)       | -0.01800                          | -20.23371       | -7.21989        | -6.74924                |
| 6         | C(13)       | 0.02224                           | 25.00275        | 8.92160         | 8.34002                 |
| 7         | C(13)       | -0.01799                          | -20.22498       | -7.21678        | -6.74633                |
| 8         | C(13)       | 0.03652                           | 41.05224        | 14.64846        | 13.69355                |
| 9         | C(13)       | -0.00583                          | -6.55309        | -2.33831        | -2.18588                |
| 10        | C(13)       | 0.00684                           | 7.69151         | 2.74452         | 2.56561                 |
| 11        | C(13)       | -0.00357                          | -4.01883        | -1.43402        | -1.34054                |
| 12        | C(13)       | 0.02227                           | 25.04008        | 8.93492         | 8.35247                 |
| 13        | C(13)       | -0.00533                          | -5.99670        | -2.13977        | -2.00028                |
| 14        | C(13)       | 0.01033                           | 11.60966        | 4.14262         | 3.87257                 |
| 15        | C(13)       | -0.00594                          | -6.67546        | -2.38197        | -2.22669                |
| 16        | C(13)       | 0.01776                           | 19.96216        | 7.12299         | 6.65866                 |
| 17        | C(13)       | -0.03390                          | -38.11379       | -13.59995       | -12.71339               |
| <b>18</b> | <b>H(1)</b> | <b>0.00604</b>                    | <b>85.98363</b> | <b>30.68110</b> | <b>28.68105</b>         |

|    |      |          |           |          |          |
|----|------|----------|-----------|----------|----------|
| 19 | H(1) | -0.00361 | -16.12529 | -5.75390 | -5.37882 |
| 20 | H(1) | 0.00235  | 10.49170  | 3.74370  | 3.49966  |
| 21 | H(1) | -0.00277 | -12.35969 | -4.41024 | -4.12275 |
| 22 | H(1) | 0.00198  | 8.86265   | 3.16242  | 2.95626  |
| 23 | H(1) | 0.00101  | 4.49351   | 1.60340  | 1.49887  |
| 24 | H(1) | 0.00113  | 5.04094   | 1.79873  | 1.68148  |
| 25 | H(1) | 0.00052  | 2.33611   | 0.83358  | 0.77924  |
| 26 | H(1) | 0.00053  | 2.38956   | 0.85265  | 0.79707  |
| 27 | H(1) | 0.00092  | 4.13421   | 1.47519  | 1.37902  |
| 28 | H(1) | 0.00058  | 2.60042   | 0.92789  | 0.86741  |
| 29 | H(1) | 0.00015  | 0.69205   | 0.24694  | 0.23084  |
| 30 | H(1) | -0.00106 | -4.75754  | -1.69761 | -1.58694 |
| 31 | H(1) | 0.00037  | 1.67207   | 0.59664  | 0.55774  |
| 32 | H(1) | -0.00212 | -9.45994  | -3.37554 | -3.15550 |

-----  
Temperature: 298K  
-----

|           |             | Isotropic Fermi Contact Couplings |                  |                 |                         |
|-----------|-------------|-----------------------------------|------------------|-----------------|-------------------------|
| Atom      |             | a.u.                              | MegaHertz        | Gauss           | 10(-4) cm <sup>-1</sup> |
| 1         | S(33)       | 0.02514                           | 8.63382          | 3.08076         | 2.87993                 |
| 2         | C(13)       | 0.16894                           | 189.91649        | 67.76693        | 63.34932                |
| 3         | C(13)       | -0.10119                          | -113.75353       | -40.59009       | -37.94409               |
| 4         | C(13)       | 0.06999                           | 78.68441         | 28.07655        | 26.24629                |
| 5         | C(13)       | -0.04367                          | -49.09122        | -17.51697       | -16.37507               |
| 6         | C(13)       | 0.04135                           | 46.49007         | 16.58881        | 15.50742                |
| 7         | C(13)       | -0.04297                          | -48.31094        | -17.23854       | -16.11479               |
| 8         | C(13)       | 0.07508                           | 84.40067         | 30.11626        | 28.15303                |
| 9         | C(13)       | -0.01189                          | -13.36540        | -4.76911        | -4.45822                |
| 10        | C(13)       | 0.00847                           | 9.52310          | 3.39808         | 3.17656                 |
| 11        | C(13)       | 0.00115                           | 1.29388          | 0.46169         | 0.43159                 |
| 12        | C(13)       | 0.00692                           | 7.78114          | 2.77650         | 2.59551                 |
| 13        | C(13)       | 0.02650                           | 29.79448         | 10.63141        | 9.93837                 |
| 14        | C(13)       | -0.03028                          | -34.04078        | -12.14660       | -11.35478               |
| 15        | C(13)       | 0.02398                           | 26.95843         | 9.61944         | 8.99236                 |
| 16        | C(13)       | 0.00626                           | 7.03442          | 2.51006         | 2.34643                 |
| 17        | C(13)       | -0.05049                          | -56.76366        | -20.25468       | -18.93432               |
| <b>18</b> | <b>H(1)</b> | <b>0.01087</b>                    | <b>154.69928</b> | <b>55.20055</b> | <b>51.60212</b>         |
| 19        | H(1)        | -0.00867                          | -38.76676        | -13.83295       | -12.93120               |
| 20        | H(1)        | 0.00629                           | 28.10109         | 10.02717        | 9.37351                 |
| 21        | H(1)        | -0.00478                          | -21.35236        | -7.61905        | -7.12238                |
| 22        | H(1)        | 0.00555                           | 24.81646         | 8.85513         | 8.27788                 |
| 23        | H(1)        | 0.00184                           | 8.22007          | 2.93313         | 2.74192                 |
| 24        | H(1)        | 0.00229                           | 10.22900         | 3.64996         | 3.41203                 |
| 25        | H(1)        | 0.00027                           | 1.20758          | 0.43089         | 0.40280                 |
| 26        | H(1)        | 0.00088                           | 3.93145          | 1.40284         | 1.31139                 |
| 27        | H(1)        | -0.00028                          | -1.24415         | -0.44394        | -0.41500                |
| 28        | H(1)        | -0.00010                          | -0.45255         | -0.16148        | -0.15095                |
| 29        | H(1)        | -0.00355                          | -15.87500        | -5.66459        | -5.29533                |
| 30        | H(1)        | 0.00523                           | 23.37448         | 8.34060         | 7.79689                 |
| 31        | H(1)        | -0.00328                          | -14.65807        | -5.23036        | -4.88941                |
| 32        | H(1)        | 0.00001                           | 0.04701          | 0.01677         | 0.01568                 |

## 6Mu

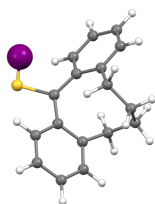

E(UB3LYP) = -1056.20031344 A.U.

| Center Number | Atomic Number | Atomic Type | Coordinates (Angstroms) |           |           |
|---------------|---------------|-------------|-------------------------|-----------|-----------|
|               |               |             | X                       | Y         | Z         |
| 1             | 6             | 0           | -1.324005               | 0.609142  | -0.015805 |
| 2             | 6             | 0           | -0.004709               | 1.243580  | 0.018392  |
| 3             | 6             | 0           | 2.920287                | -1.081120 | 0.721990  |
| 4             | 6             | 0           | 1.315046                | 0.608569  | 0.012067  |
| 5             | 1             | 0           | 3.135257                | -1.981517 | 1.294286  |
| 6             | 6             | 0           | 1.609683                | -0.591326 | 0.730446  |
| 7             | 6             | 0           | 3.951202                | -0.451998 | 0.026101  |
| 8             | 16            | 0           | -0.061372               | 3.025806  | -0.013758 |
| 9             | 1             | 0           | 4.956458                | -0.863849 | 0.044919  |
| 10            | 6             | 0           | 3.670971                | 0.714629  | -0.687714 |
| 11            | 6             | 0           | -1.600910               | -0.602697 | -0.723661 |
| 12            | 1             | 0           | 4.452387                | 1.218793  | -1.250241 |
| 13            | 6             | 0           | 2.383082                | 1.232937  | -0.684509 |
| 14            | 1             | 0           | 2.173586                | 2.125343  | -1.265190 |
| 15            | 6             | 0           | -2.412057               | 1.242428  | 0.643989  |
| 16            | 1             | 0           | -2.220903               | 2.151342  | 1.203445  |
| 17            | 6             | 0           | -3.697643               | 0.720990  | 0.624744  |
| 18            | 1             | 0           | -4.493898               | 1.235291  | 1.156318  |
| 19            | 6             | 0           | -3.957505               | -0.461726 | -0.070464 |
| 20            | 1             | 0           | -4.960395               | -0.878504 | -0.103320 |
| 21            | 6             | 0           | -2.909151               | -1.098703 | -0.731810 |
| 22            | 1             | 0           | -3.108256               | -2.010009 | -1.292449 |
| 23            | 6             | 0           | 0.569389                | -1.356759 | 1.518390  |
| 24            | 6             | 0           | -0.549247               | -1.376615 | -1.488268 |
| 25            | 6             | 0           | -0.005704               | -2.612340 | 0.796016  |
| 26            | 6             | 0           | 0.017455                | -2.624179 | -0.746259 |
| 27            | 1             | 0           | -0.247930               | -0.689765 | 1.794804  |
| 28            | 1             | 0           | 1.022897                | -1.686641 | 2.461298  |
| 29            | 1             | 0           | -1.035174               | -2.757403 | 1.144298  |
| 30            | 1             | 0           | 0.551192                | -3.498947 | 1.125566  |
| 31            | 1             | 0           | -0.545891               | -3.511915 | -1.061613 |
| 32            | 1             | 0           | 1.045691                | -2.782194 | -1.092797 |
| 33            | 1             | 0           | 0.270531                | -0.713203 | -1.764895 |
| 34            | 1             | 0           | -0.991934               | -1.718286 | -2.432108 |
| 35            | 1             | 0           | 1.121250                | 3.259696  | 0.595935  |

Zero-point correction= 0.291612 (Hartree/Particle)  
 Thermal correction to Energy= 0.306665  
 Thermal correction to Enthalpy= 0.307610  
 Thermal correction to Gibbs Free Energy= 0.249080  
 Sum of electronic and zero-point Energies= -1055.908701  
 Sum of electronic and thermal Energies= -1055.893648  
 Sum of electronic and thermal Enthalpies= -1055.892704  
 Sum of electronic and thermal Free Energies= -1055.951233

## Vibrational averaging

[Input (inpart)]

# freq=(anharmonic,readanharm) ub3lyp/6-31g(d)

```
0 2
C          -1.32401   0.60914  -0.01581
C          -0.00471   1.24358   0.01839
C           2.92029  -1.08112   0.72199
C           1.31505   0.60857   0.01207
H           3.13526  -1.98152   1.29429
C           1.60968  -0.59133   0.73045
C           3.9512   -0.452    0.0261
S          -0.06137   3.02581  -0.01376
H           4.95646  -0.86385   0.04492
C           3.67097   0.71463  -0.68771
C          -1.60091  -0.6027   -0.72366
H           4.45239   1.21879  -1.25024
C           2.38308   1.23294  -0.68451
H           2.17359   2.12534  -1.26519
C          -2.41206   1.24243   0.64399
H          -2.2209   2.15134   1.20345
C          -3.69764   0.72099   0.62474
H          -4.4939   1.23529   1.15632
C          -3.95751  -0.46173  -0.07046
H          -4.9604  -0.8785   -0.10332
C          -2.90915  -1.0987   -0.73181
H          -3.10826  -2.01001  -1.29245
C           0.56939  -1.35676   1.51839
C          -0.54925  -1.37662  -1.48827
C          -0.0057   -2.61234   0.79602
C           0.01746  -2.62418  -0.74626
H          -0.24793  -0.68977   1.7948
H           1.0229   -1.68664   2.4613
H          -1.03517  -2.7574   1.1443
H           0.55119  -3.49895   1.12557
H          -0.54589  -3.51192  -1.06161
H           1.04569  -2.78219  -1.0928
H           0.27053  -0.7132   -1.7649
H          -0.99193  -1.71829  -2.43211
H(Iso=0.113429,NMagM=8.890597)  1.12125  3.2597  0.59594
```

Property=Fermi

[Output (in part)]

Fermi contact terms

-----  
Property at reference geometry  
-----

|    | Atom  | Isotropic Fermi Contact Couplings |                 |                 |                 |
|----|-------|-----------------------------------|-----------------|-----------------|-----------------|
|    |       | a.u.                              | MegaHertz       | Gauss           | 10(-4) cm-1     |
| 1  | C(13) | -0.02798                          | -31.45555       | -11.22412       | -10.49244       |
| 2  | C(13) | 0.08275                           | 93.02972        | 33.19532        | 31.03137        |
| 3  | C(13) | -0.01036                          | -11.64294       | -4.15449        | -3.88367        |
| 4  | C(13) | -0.02667                          | -29.98135       | -10.69809       | -10.00070       |
| 5  | H(1)  | 0.00096                           | 4.27158         | 1.52421         | 1.42485         |
| 6  | C(13) | 0.02301                           | 25.86454        | 9.22911         | 8.62748         |
| 7  | C(13) | 0.01483                           | 16.67714        | 5.95082         | 5.56290         |
| 8  | S(33) | 0.01357                           | 4.66136         | 1.66329         | 1.55486         |
| 9  | H(1)  | -0.00208                          | -9.27558        | -3.30976        | -3.09400        |
| 10 | C(13) | -0.00981                          | -11.02713       | -3.93475        | -3.67825        |
| 11 | C(13) | 0.02393                           | 26.89844        | 9.59803         | 8.97235         |
| 12 | H(1)  | 0.00116                           | 5.16544         | 1.84316         | 1.72300         |
| 13 | C(13) | 0.01826                           | 20.52785        | 7.32485         | 6.84735         |
| 14 | H(1)  | -0.00210                          | -9.36502        | -3.34167        | -3.12384        |
| 15 | C(13) | 0.01845                           | 20.74329        | 7.40172         | 6.91922         |
| 16 | H(1)  | -0.00218                          | -9.73060        | -3.47212        | -3.24578        |
| 17 | C(13) | -0.01089                          | -12.24417       | -4.36903        | -4.08422        |
| 18 | H(1)  | 0.00119                           | 5.33986         | 1.90539         | 1.78118         |
| 19 | C(13) | 0.01617                           | 18.17567        | 6.48553         | 6.06275         |
| 20 | H(1)  | -0.00225                          | -10.07760       | -3.59594        | -3.36153        |
| 21 | C(13) | -0.01124                          | -12.63252       | -4.50760        | -4.21376        |
| 22 | H(1)  | 0.00104                           | 4.63510         | 1.65392         | 1.54610         |
| 23 | C(13) | -0.00388                          | -4.35836        | -1.55517        | -1.45379        |
| 24 | C(13) | -0.00426                          | -4.79175        | -1.70981        | -1.59835        |
| 25 | C(13) | 0.00372                           | 4.18563         | 1.49354         | 1.39617         |
| 26 | C(13) | 0.00426                           | 4.78795         | 1.70846         | 1.59709         |
| 27 | H(1)  | 0.00033                           | 1.48226         | 0.52891         | 0.49443         |
| 28 | H(1)  | 0.00108                           | 4.80744         | 1.71542         | 1.60359         |
| 29 | H(1)  | 0.00040                           | 1.77751         | 0.63426         | 0.59291         |
| 30 | H(1)  | -0.00013                          | -0.57733        | -0.20601        | -0.19258        |
| 31 | H(1)  | -0.00015                          | -0.65019        | -0.23200        | -0.21688        |
| 32 | H(1)  | 0.00037                           | 1.66066         | 0.59256         | 0.55394         |
| 33 | H(1)  | 0.00038                           | 1.69123         | 0.60347         | 0.56413         |
| 34 | H(1)  | 0.00122                           | 5.44673         | 1.94353         | 1.81683         |
| 35 | H(1)  | <b>0.00231</b>                    | <b>32.86369</b> | <b>11.72658</b> | <b>10.96215</b> |

-----  
Temperature: 0K  
-----

|    | Atom  | Isotropic Fermi Contact Couplings |           |           |             |
|----|-------|-----------------------------------|-----------|-----------|-------------|
|    |       | a.u.                              | MegaHertz | Gauss     | 10(-4) cm-1 |
| 1  | C(13) | -0.03651                          | -41.04325 | -14.64525 | -13.69055   |
| 2  | C(13) | 0.11765                           | 132.25895 | 47.19328  | 44.11684    |
| 3  | C(13) | -0.01606                          | -18.04960 | -6.44055  | -6.02070    |
| 4  | C(13) | -0.04233                          | -47.58387 | -16.97911 | -15.87227   |
| 5  | H(1)  | 0.00196                           | 8.76878   | 3.12892   | 2.92495     |
| 6  | C(13) | 0.03036                           | 34.13344  | 12.17966  | 11.38569    |
| 7  | C(13) | 0.02035                           | 22.87287  | 8.16161   | 7.62957     |
| 8  | S(33) | 0.01495                           | 5.13490   | 1.83226   | 1.71282     |
| 9  | H(1)  | -0.00278                          | -12.44124 | -4.43934  | -4.14995    |
| 10 | C(13) | -0.01555                          | -17.47995 | -6.23728  | -5.83068    |
| 11 | C(13) | 0.02247                           | 25.26451  | 9.01501   | 8.42733     |
| 12 | H(1)  | 0.00222                           | 9.90967   | 3.53602   | 3.30551     |
| 13 | C(13) | 0.02618                           | 29.42887  | 10.50095  | 9.81641     |
| 14 | H(1)  | -0.00261                          | -11.66109 | -4.16097  | -3.88972    |
| 15 | C(13) | 0.01646                           | 18.50926  | 6.60456   | 6.17403     |

|           |             |                |                 |                 |                 |
|-----------|-------------|----------------|-----------------|-----------------|-----------------|
| 16        | H(1)        | -0.00122       | -5.44428        | -1.94266        | -1.81602        |
| 17        | C(13)       | -0.00550       | -6.17829        | -2.20457        | -2.06086        |
| 18        | H(1)        | 0.00061        | 2.71470         | 0.96867         | 0.90553         |
| 19        | C(13)       | 0.01131        | 12.71960        | 4.53867         | 4.24280         |
| 20        | H(1)        | -0.00155       | -6.93801        | -2.47565        | -2.31427        |
| 21        | C(13)       | -0.00729       | -8.18975        | -2.92231        | -2.73181        |
| 22        | H(1)        | 0.00077        | 3.45091         | 1.23137         | 1.15110         |
| 23        | C(13)       | -0.00434       | -4.87452        | -1.73935        | -1.62597        |
| 24        | C(13)       | -0.00305       | -3.42715        | -1.22289        | -1.14317        |
| 25        | C(13)       | 0.00496        | 5.57852         | 1.99056         | 1.86080         |
| 26        | C(13)       | 0.00364        | 4.08699         | 1.45834         | 1.36327         |
| 27        | H(1)        | 0.00042        | 1.85887         | 0.66329         | 0.62005         |
| 28        | H(1)        | 0.00130        | 5.80348         | 2.07082         | 1.93583         |
| 29        | H(1)        | 0.00042        | 1.87194         | 0.66795         | 0.62441         |
| 30        | H(1)        | -0.00011       | -0.47085        | -0.16801        | -0.15706        |
| 31        | H(1)        | -0.00007       | -0.29126        | -0.10393        | -0.09715        |
| 32        | H(1)        | 0.00042        | 1.87423         | 0.66877         | 0.62518         |
| 33        | H(1)        | 0.00026        | 1.15407         | 0.41180         | 0.38496         |
| 34        | H(1)        | 0.00100        | 4.45798         | 1.59072         | 1.48702         |
| <b>35</b> | <b>H(1)</b> | <b>0.00665</b> | <b>94.61986</b> | <b>33.76272</b> | <b>31.56179</b> |

Temperature: 298K

|           |             | Isotropic Fermi Contact Couplings |                  |                 |                         |
|-----------|-------------|-----------------------------------|------------------|-----------------|-------------------------|
| Atom      |             | a.u.                              | MegaHertz        | Gauss           | 10(-4) cm <sup>-1</sup> |
| 1         | C(13)       | -0.05945                          | -66.82829        | -23.84600       | -22.29152               |
| 2         | C(13)       | 0.20152                           | 226.54825        | 80.83805        | 75.56836                |
| 3         | C(13)       | -0.03064                          | -34.43985        | -12.28899       | -11.48790               |
| 4         | C(13)       | -0.08586                          | -96.52386        | -34.44211       | -32.19689               |
| 5         | H(1)        | 0.00454                           | 20.29865         | 7.24306         | 6.77090                 |
| 6         | C(13)       | 0.04744                           | 53.32743         | 19.02855        | 17.78812                |
| 7         | C(13)       | 0.03177                           | 35.71609         | 12.74439        | 11.91361                |
| 8         | S(33)       | 0.00010                           | 0.03542          | 0.01264         | 0.01182                 |
| 9         | H(1)        | -0.00462                          | -20.65446        | -7.37002        | -6.88959                |
| 10        | C(13)       | -0.03029                          | -34.04689        | -12.14878       | -11.35682               |
| 11        | C(13)       | 0.01382                           | 15.53977         | 5.54498         | 5.18351                 |
| 12        | H(1)        | 0.00491                           | 21.95821         | 7.83524         | 7.32447                 |
| 13        | C(13)       | 0.04410                           | 49.57497         | 17.68958        | 16.53643                |
| 14        | H(1)        | -0.00399                          | -17.82068        | -6.35886        | -5.94434                |
| 15        | C(13)       | 0.00439                           | 4.93565          | 1.76116         | 1.64636                 |
| 16        | H(1)        | 0.00194                           | 8.69029          | 3.10091         | 2.89877                 |
| 17        | C(13)       | 0.01290                           | 14.50153         | 5.17451         | 4.83719                 |
| 18        | H(1)        | -0.00147                          | -6.57558         | -2.34633        | -2.19338                |
| 19        | C(13)       | -0.00898                          | -10.09144        | -3.60088        | -3.36614                |
| 20        | H(1)        | 0.00091                           | 4.04768          | 1.44431         | 1.35016                 |
| 21        | C(13)       | 0.00708                           | 7.96244          | 2.84120         | 2.65599                 |
| 22        | H(1)        | -0.00034                          | -1.51943         | -0.54217        | -0.50683                |
| 23        | C(13)       | -0.00513                          | -5.76436         | -2.05687        | -1.92278                |
| 24        | C(13)       | 0.00123                           | 1.37830          | 0.49181         | 0.45975                 |
| 25        | C(13)       | 0.00748                           | 8.41051          | 3.00108         | 2.80544                 |
| 26        | C(13)       | 0.00016                           | 0.17775          | 0.06343         | 0.05929                 |
| 27        | H(1)        | 0.00046                           | 2.04209          | 0.72867         | 0.68117                 |
| 28        | H(1)        | 0.00178                           | 7.96479          | 2.84203         | 2.65677                 |
| 29        | H(1)        | 0.00044                           | 1.97954          | 0.70635         | 0.66031                 |
| 30        | H(1)        | -0.00004                          | -0.17043         | -0.06082        | -0.05685                |
| 31        | H(1)        | 0.00018                           | 0.79707          | 0.28441         | 0.26587                 |
| 32        | H(1)        | 0.00051                           | 2.27430          | 0.81153         | 0.75862                 |
| 33        | H(1)        | -0.00033                          | -1.48288         | -0.52913        | -0.49463                |
| 34        | H(1)        | 0.00005                           | 0.23677          | 0.08449         | 0.07898                 |
| <b>35</b> | <b>H(1)</b> | <b>0.00970</b>                    | <b>137.95520</b> | <b>49.22585</b> | <b>46.01690</b>         |

**Table S2.** DFT-calculated muon hfcs for **4Mu**, **5Mu**, and **6Mu** at UB3LYP/6-31G(d)

|                                                 | <b>4Mu</b> | <b>5Mu</b> | <b>6Mu</b> |
|-------------------------------------------------|------------|------------|------------|
| $A_{\mu}^{\text{calc}}$<br>(w/o isotope effect) | 21.8       | 29.4       | 32.9       |
| $A_{\mu}^{\text{calc}}$<br>(averaged, 0 K)      | 71.8       | 86.0       | 94.6       |
| $A_{\mu}^{\text{calc}}$<br>(averaged, 298 K)    | 121.4      | 154.7      | 138.0      |

## Copies of NMR charts

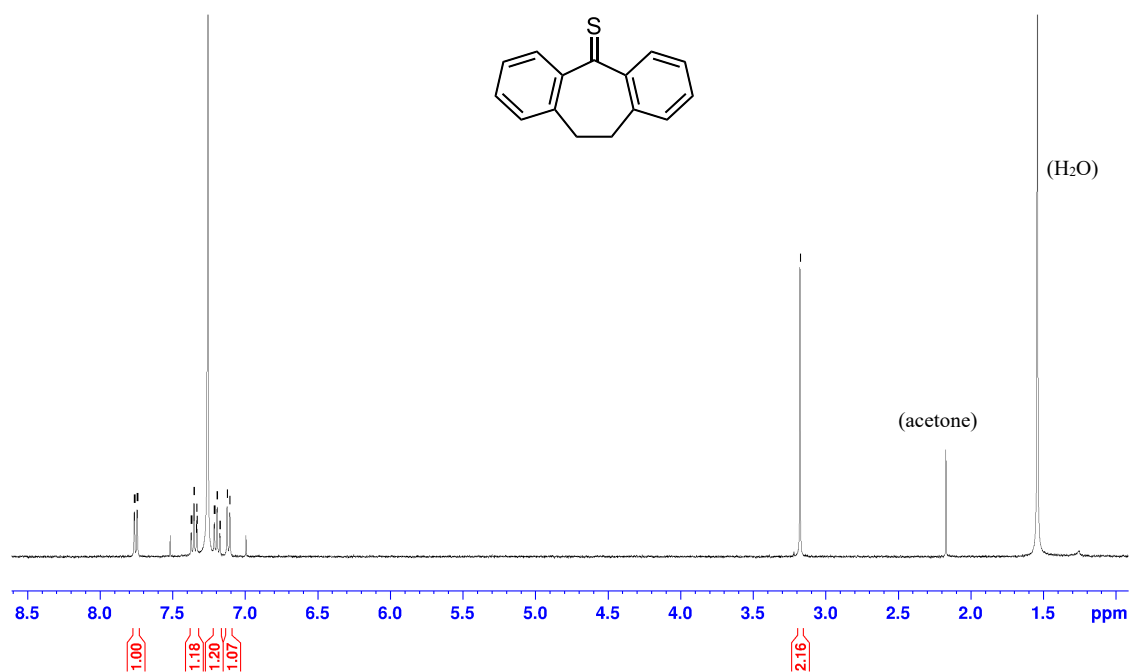

$^1\text{H}$  NMR of 4 (400 MHz,  $\text{CDCl}_3$ )

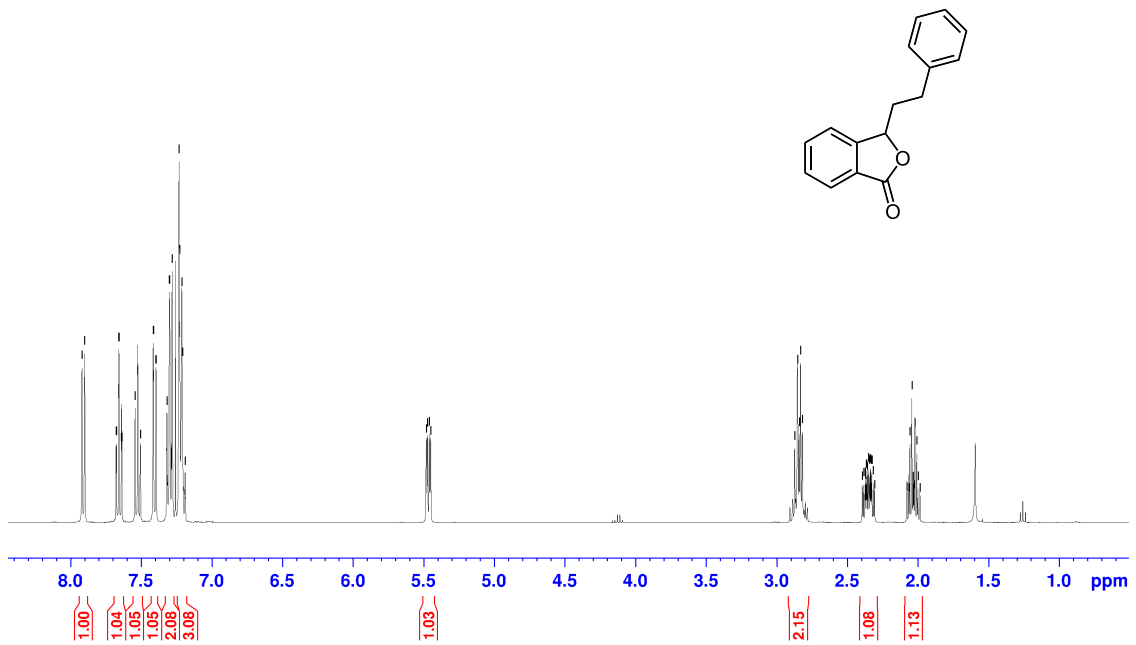

<sup>1</sup>H NMR of 7 (400 MHz, CDCl<sub>3</sub>)

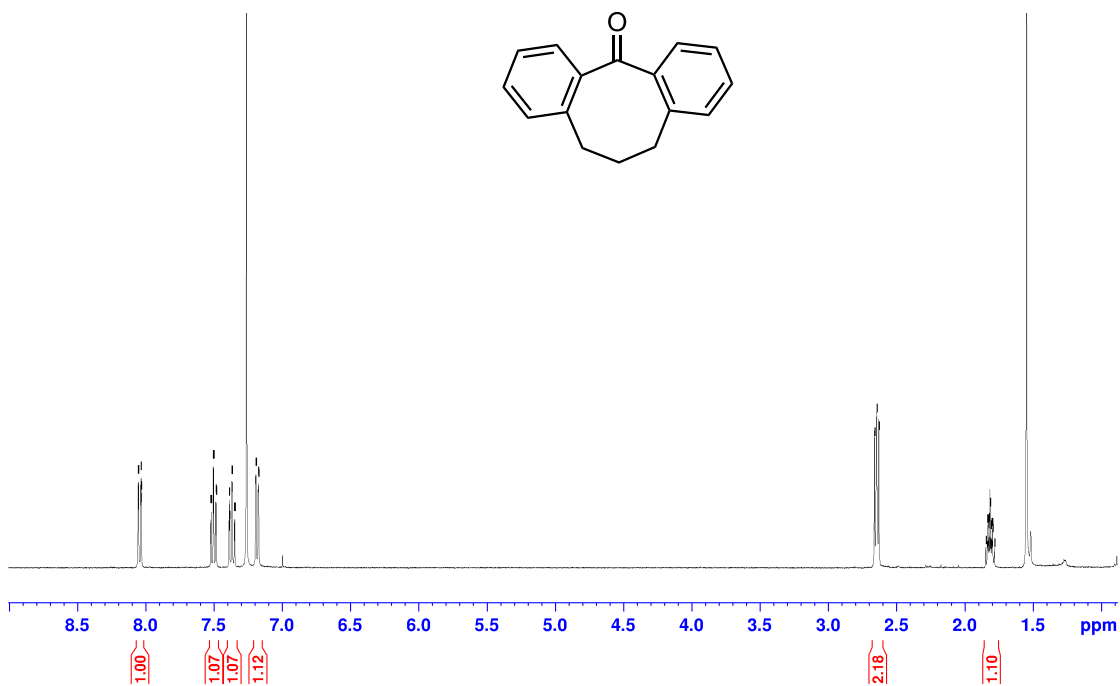

<sup>1</sup>H NMR of **10** (400 MHz, CDCl<sub>3</sub>)

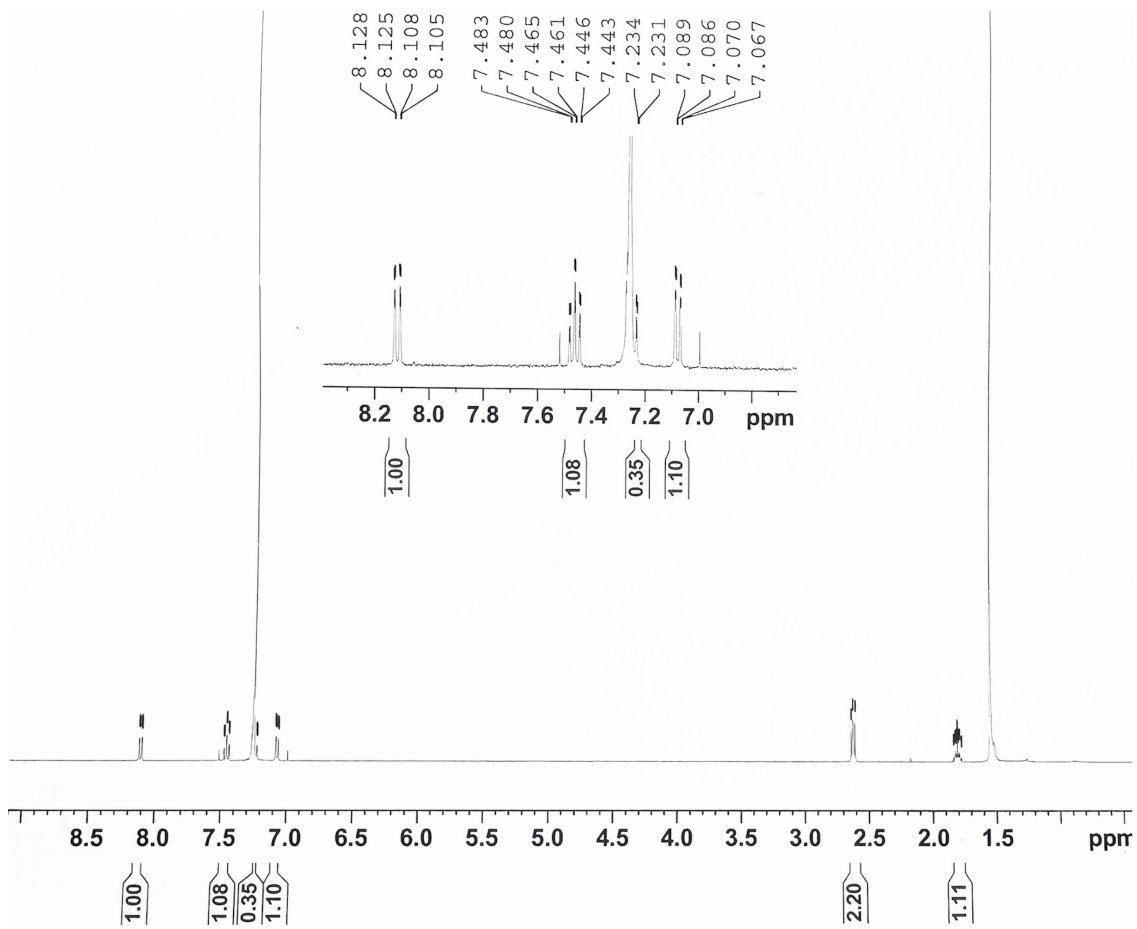

$^1\text{H}$  NMR of **5** (400 MHz,  $\text{CDCl}_3$ )

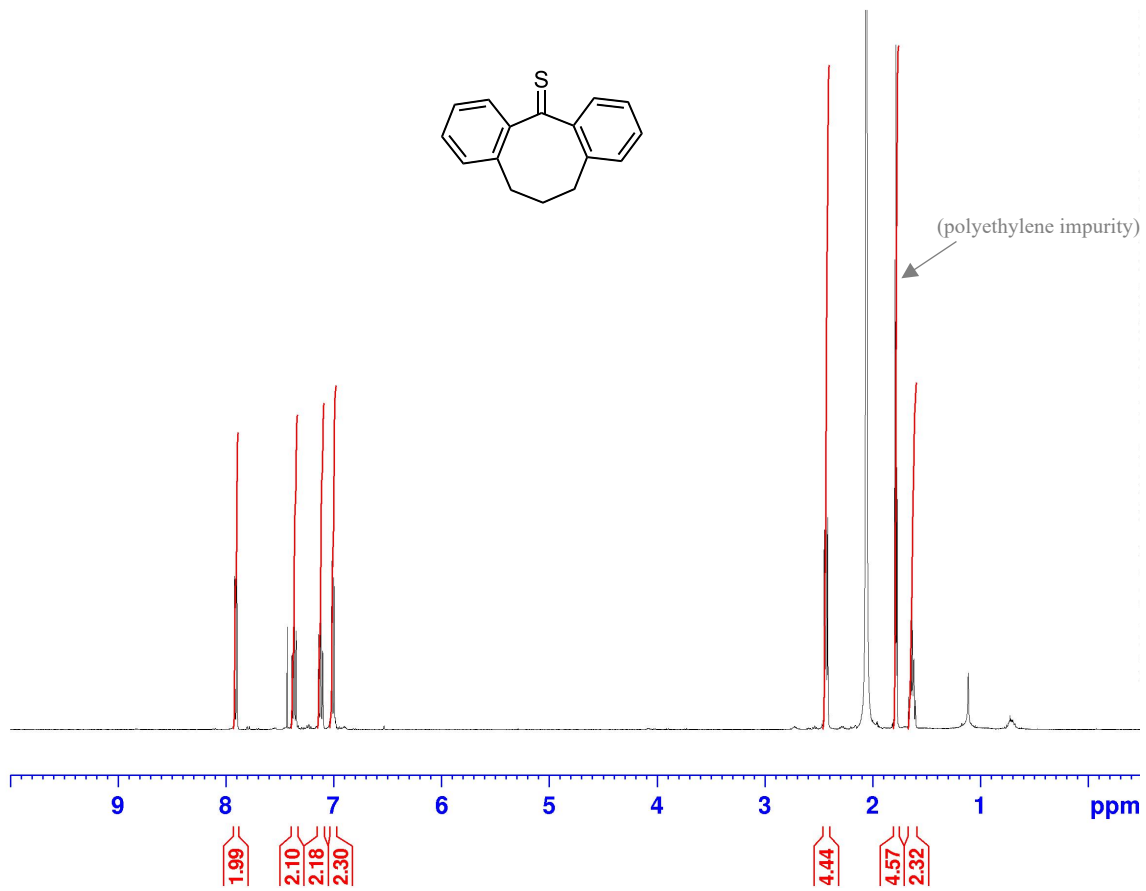

$^1\text{H}$  NMR of **5** (400 MHz, acetonitrile- $d_3$ )

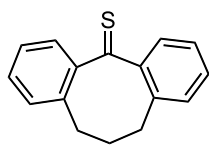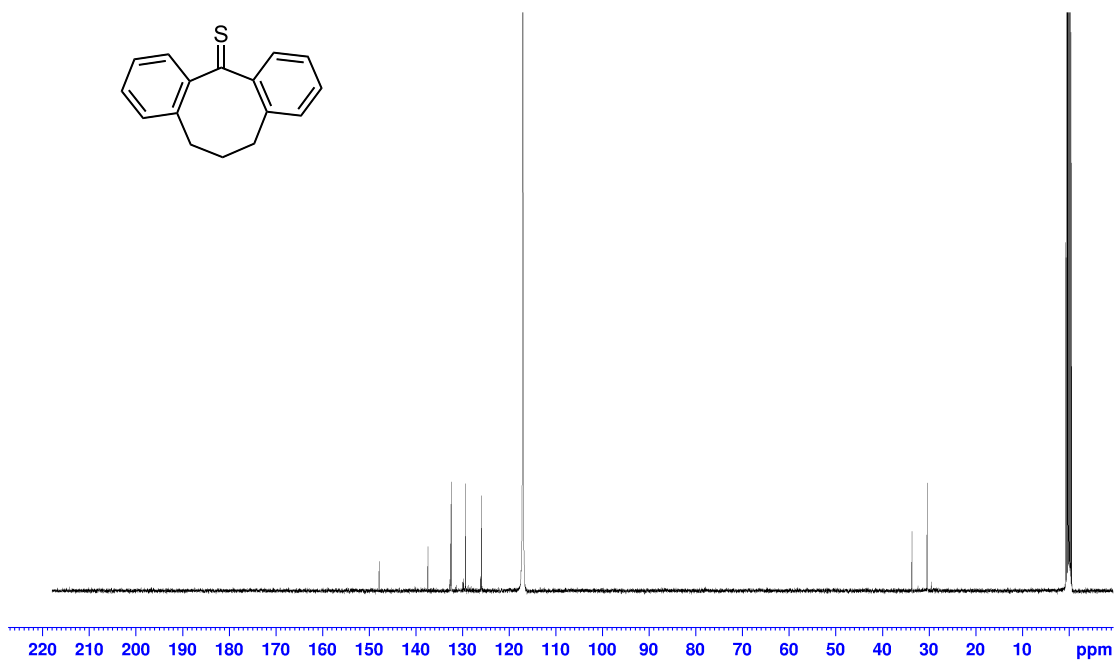

$^{13}\text{C}\{^1\text{H}\}$  NMR of **5** (101 MHz, acetonitrile- $d_3$ )

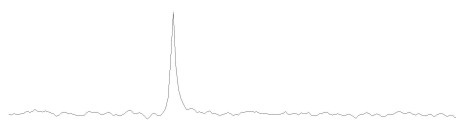

$^{13}\text{C}\{^1\text{H}\}$  NMR of **5** ( $\text{C}=\text{S}$ , 101 MHz,  $\text{CDCl}_3$ )

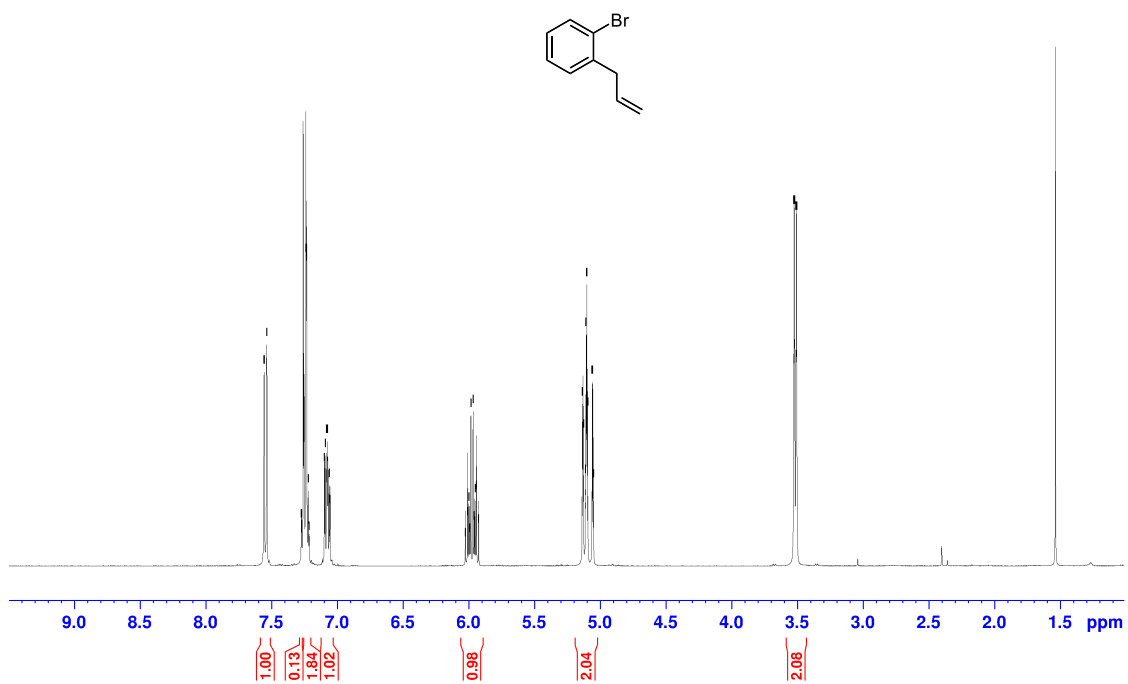

$^1\text{H}$  NMR of **11** (400 MHz,  $\text{CDCl}_3$ )

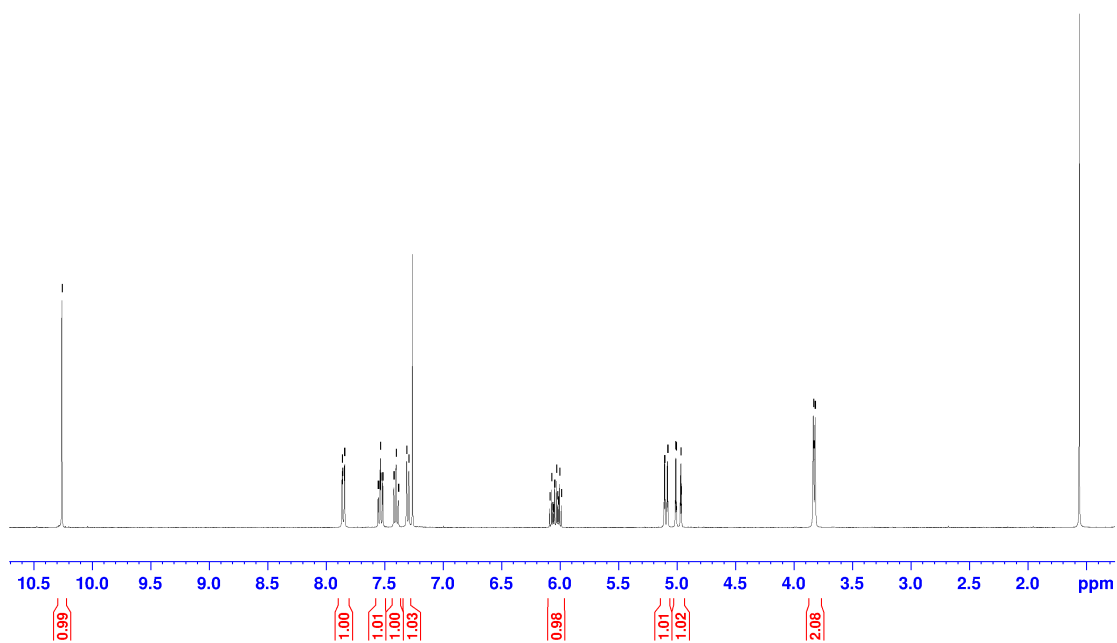

$^1\text{H}$  NMR of **12** (400 MHz,  $\text{CDCl}_3$ )

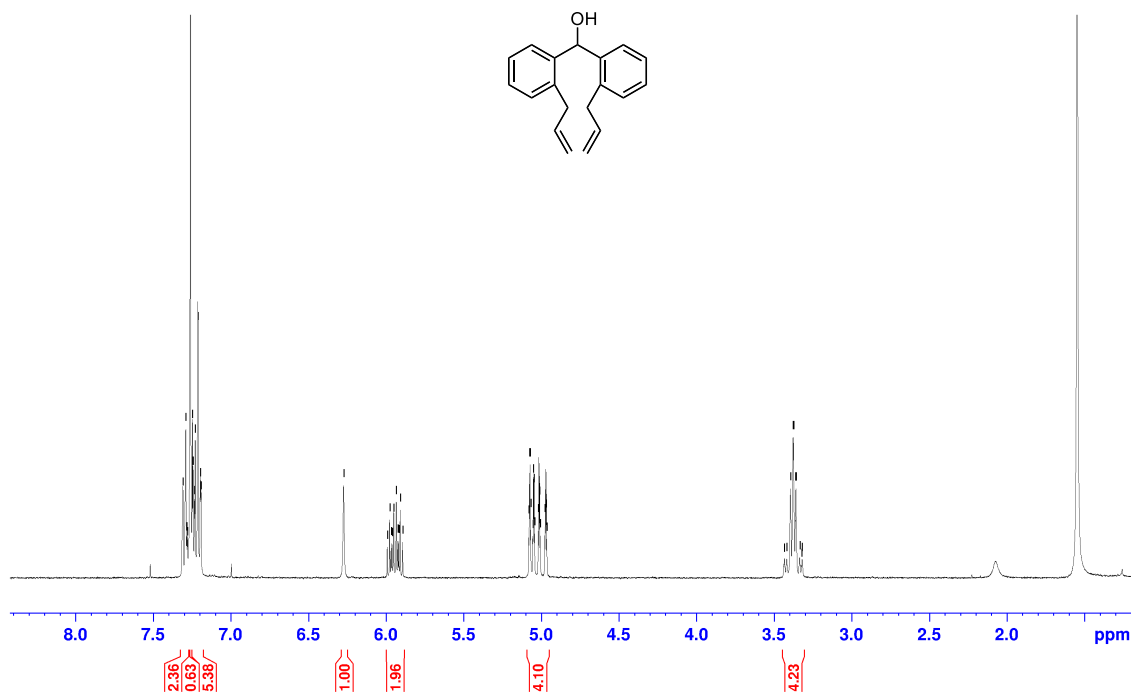

$^1\text{H}$  NMR of **13** (400 MHz,  $\text{CDCl}_3$ )

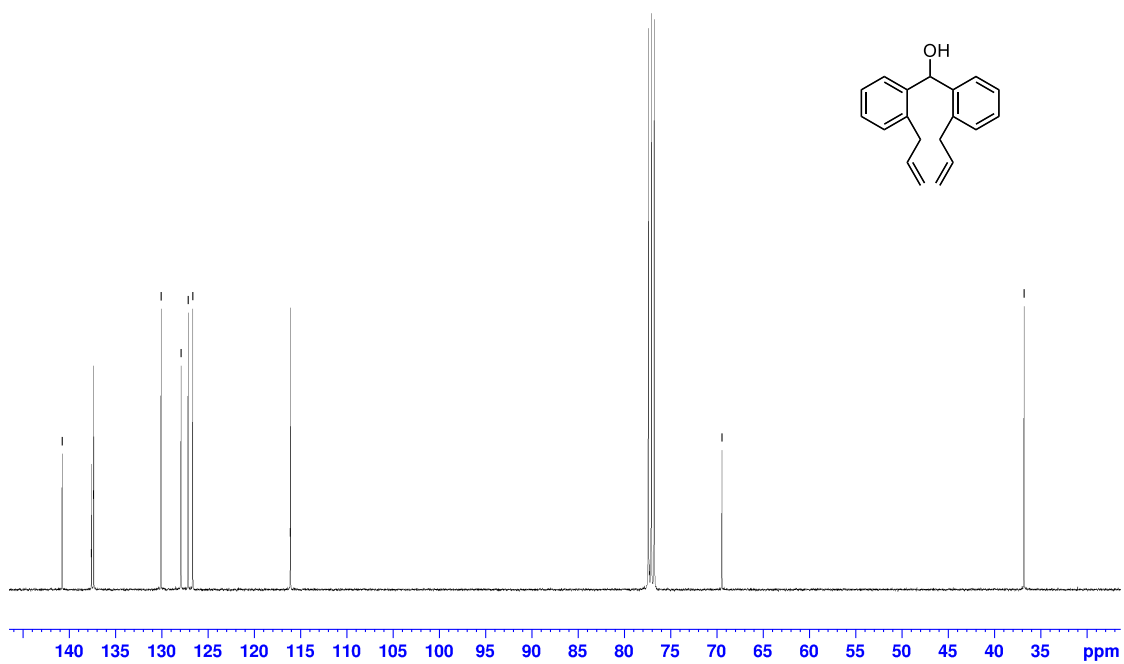

$^{13}\text{C}\{^1\text{H}\}$  NMR of **13** (101 MHz,  $\text{CDCl}_3$ )

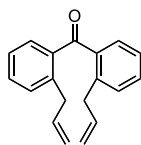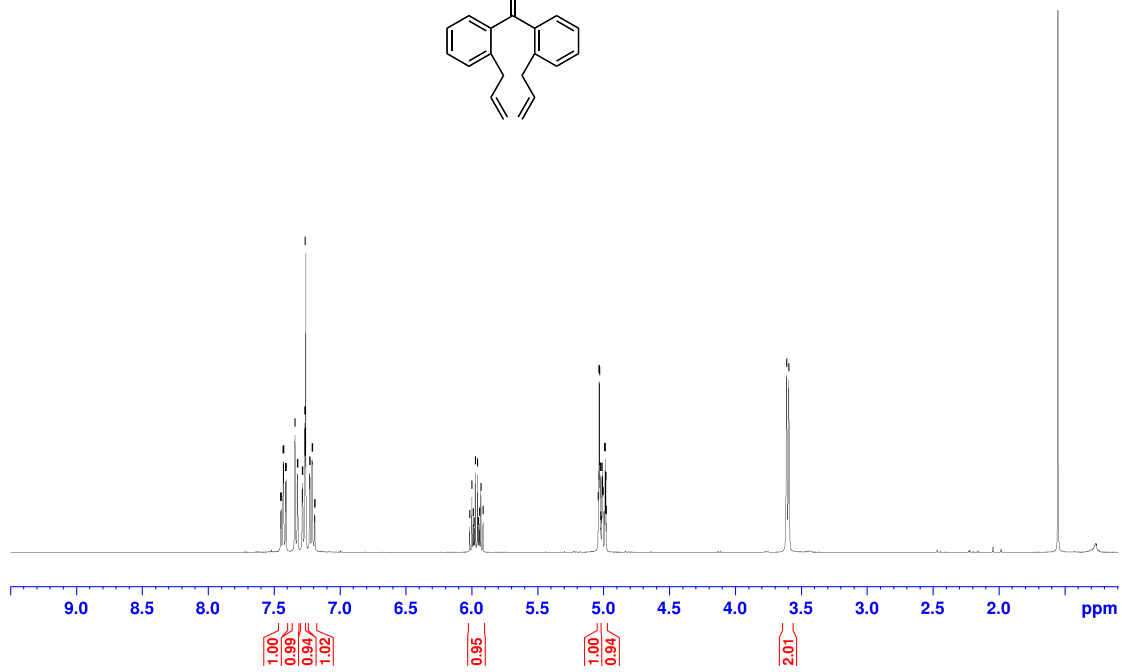

$^1\text{H}$  NMR of **14** (400 MHz,  $\text{CDCl}_3$ )

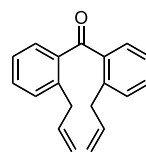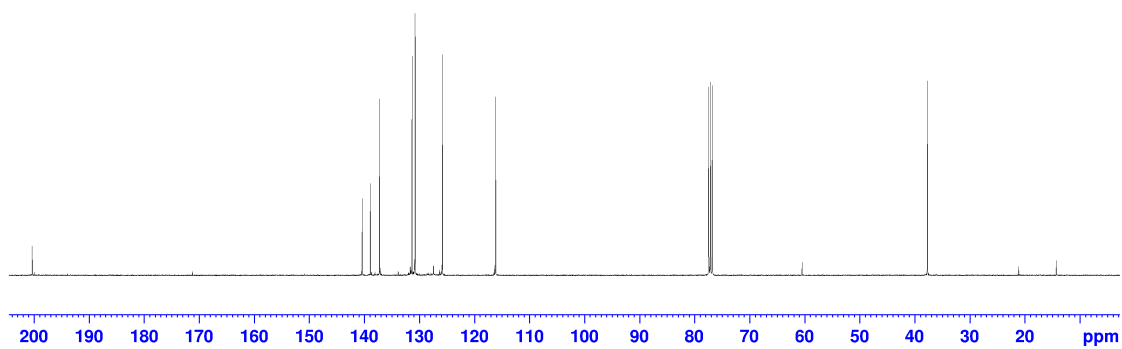

$^{13}\text{C}\{^1\text{H}\}$  NMR of **14** (101 MHz,  $\text{CDCl}_3$ )

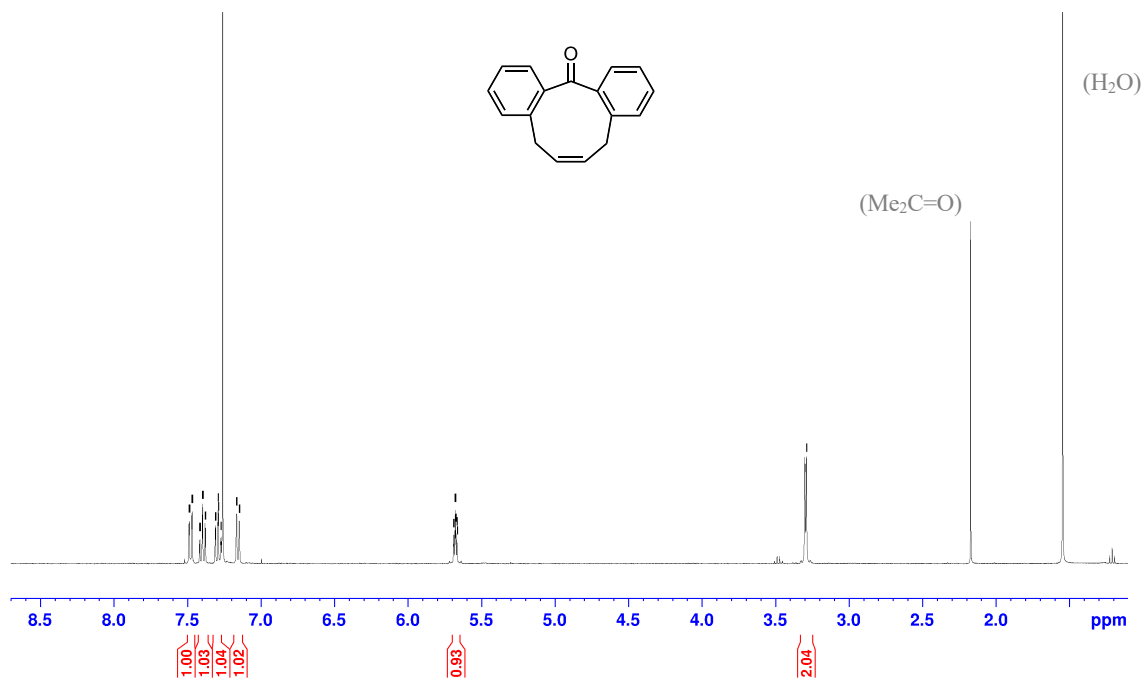

$^1\text{H}$  NMR of **15** (400 MHz,  $\text{CDCl}_3$ )

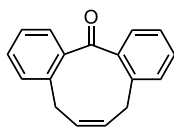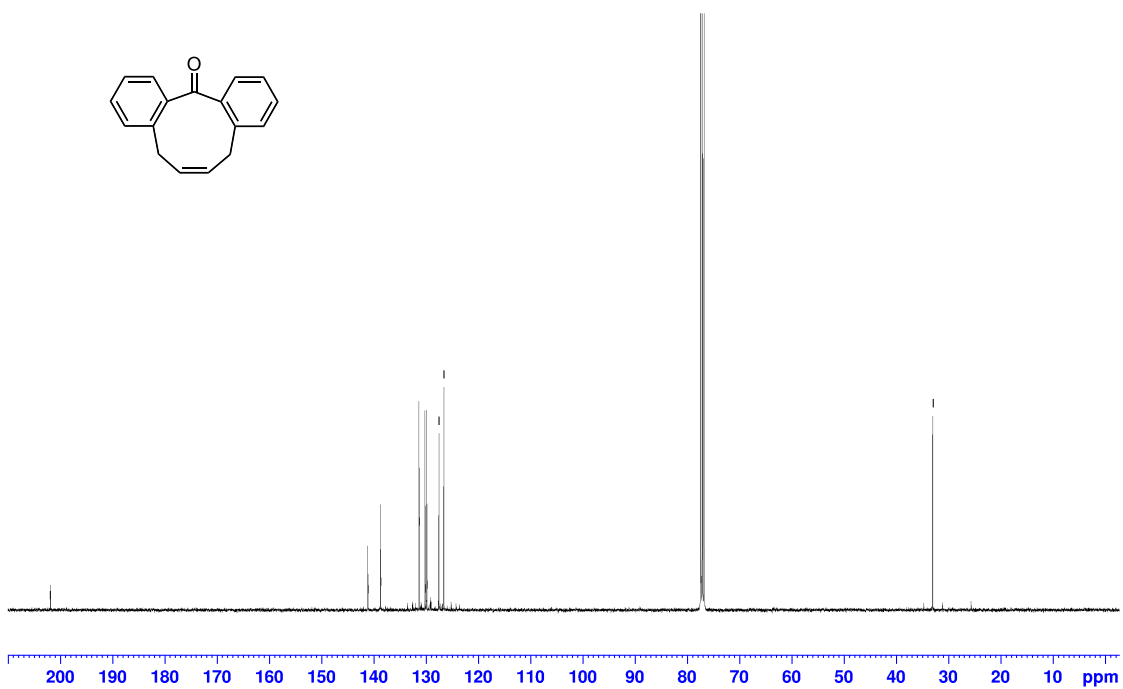

$^{13}\text{C}\{^1\text{H}\}$  NMR of **15** (101 MHz,  $\text{CDCl}_3$ )

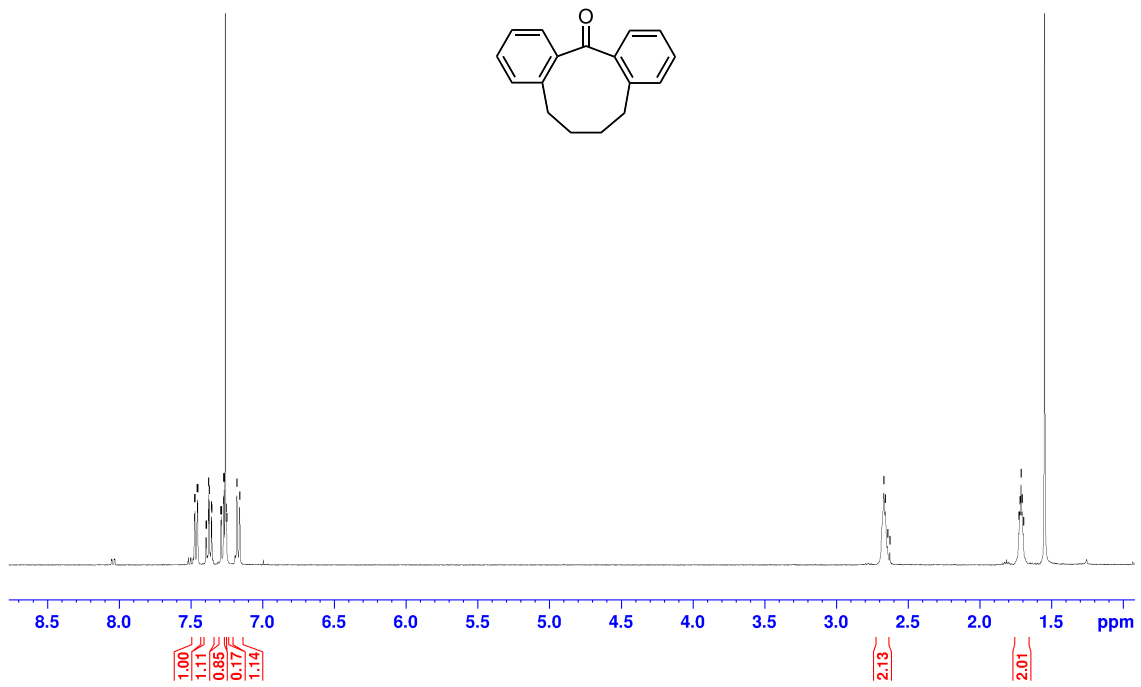

$^1\text{H}$  NMR of **16** (400 MHz,  $\text{CDCl}_3$ )

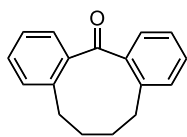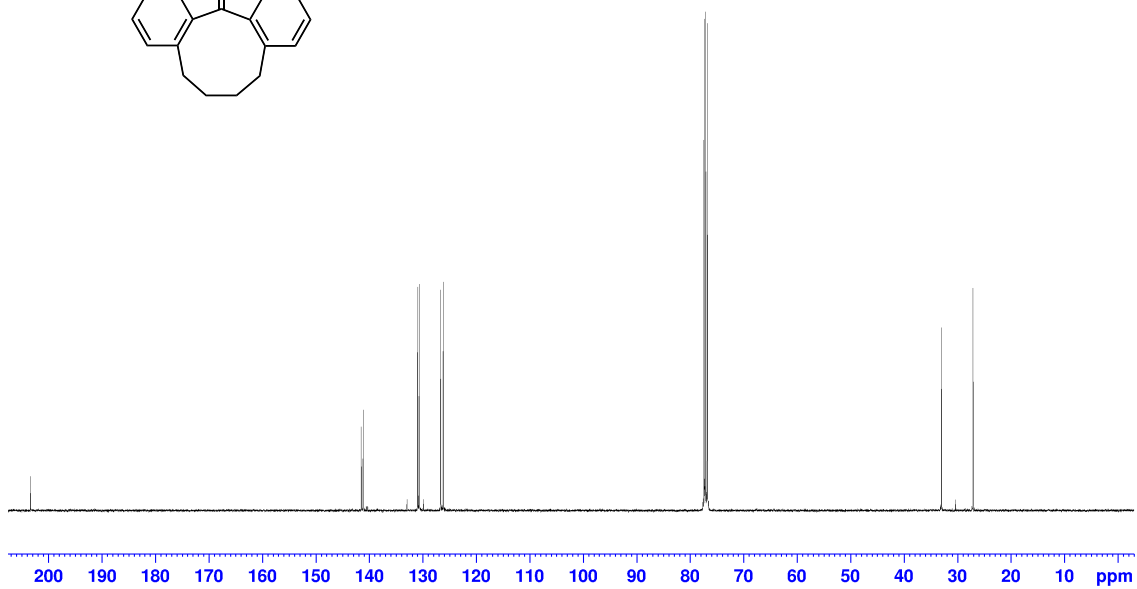

$^{13}\text{C}\{^1\text{H}\}$  NMR of **16** (101 MHz,  $\text{CDCl}_3$ )

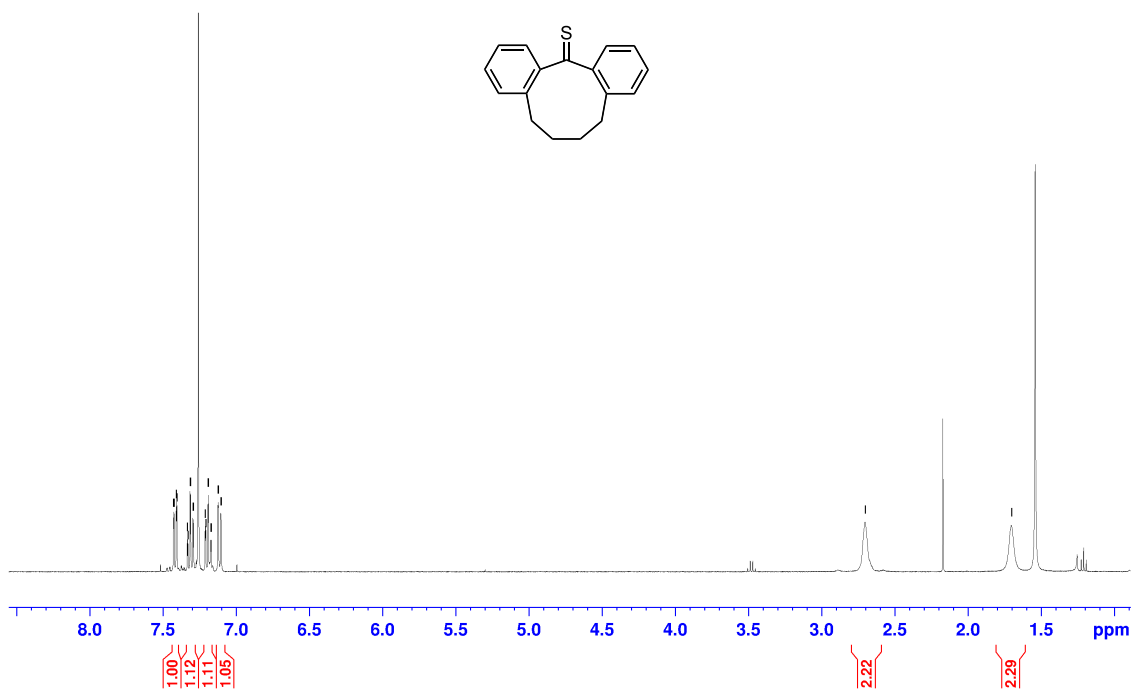

$^1\text{H}$  NMR of **6** (400 MHz,  $\text{CDCl}_3$ )

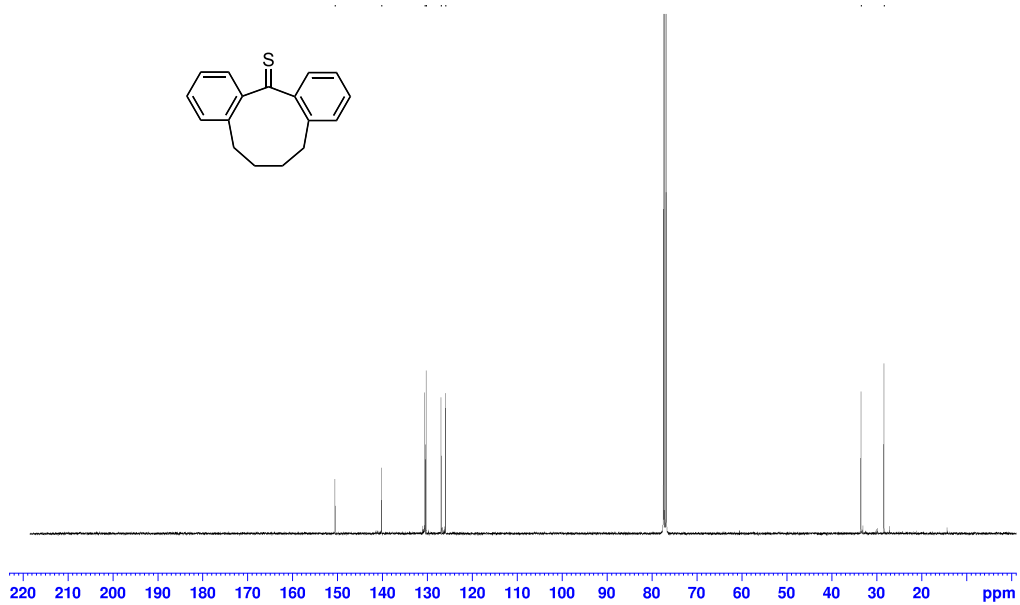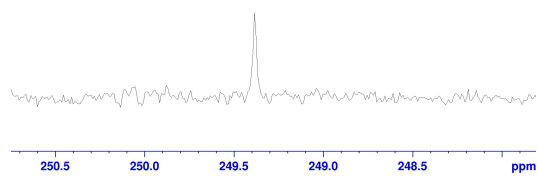

$^{13}\text{C}\{^1\text{H}\}$  NMR of **16** (101 MHz,  $\text{CDCl}_3$ )
